1 **Title**

2 Postnatal FGFR-signaling establishes gradients of secretory cell identities along the proximal-  
3 distal axis of the lung airways

4

5 **Authors**

6 Alexandros Sountoulidis<sup>1,2\*</sup>, Alexandra B. Firsova<sup>1,2#</sup>, Andreas Liontos<sup>1,2#</sup>, Jonas Theelke<sup>1,2#</sup>,  
7 Janine Koepke<sup>3</sup>, Pamela Millar-Büchner<sup>3</sup>, Louise Mannerås-Holm<sup>4</sup>, Åsa Björklund<sup>2</sup>,  
8 Athanasios Fysikopoulos<sup>3</sup>, Konstantin Gaengel<sup>6</sup>, Fredrik Bäckhed<sup>4,6</sup>, Christer Betsholtz<sup>6</sup>,  
9 Werner Seeger<sup>3,7</sup>, Saverio Bellusci<sup>3</sup> and Christos Samakovlis<sup>1,2,3,7\*</sup>

10

11 <sup>1</sup>Stockholm University, Molecular Biosciences, The Wenner-Gren Institute (MBW)

12 <sup>2</sup>Science for Life Laboratory, Stockholm, Sweden

13 <sup>3</sup>Justus-Liebig University of Giessen, Medical Clinic II, Department of Internal Medicine,  
14 Excellence Cluster Cardio-Pulmonary System (ECCPS), Giessen, Germany.

15 <sup>4</sup>The Wallenberg Laboratory, Department of Molecular and Clinical Medicine, Institute of  
16 Medicine, Sahlgrenska Academy, University of Gothenburg, Gothenburg, Sweden

17 <sup>5</sup>Region Västra Götaland, Sahlgrenska University Hospital, Department of Clinical Physiology,  
18 Gothenburg, Sweden

19 <sup>6</sup>Department of Immunology, Genetics and Pathology, Rudbeck Laboratory, Uppsala  
20 University, Sweden

21 <sup>7</sup>Max Planck Institute for Cardiopulmonary Research, Bad Nauheim, Germany

22 \* Corresponding authors

23 # Equal contribution

24

25

26

27

28

29 **Abstract**

30 Secretory cells are major structural and functional constituents of the lung airways. Their  
31 spatial organization and specification mechanisms are partially understood. Here, we labelled  
32 major secretory airway cell types and analysed them at single-cell resolution. We found  
33 opposing, partially overlapping gene-expression gradients along the proximal-distal airway  
34 axis superimposed on a general gene program encoding detoxification. One graded program  
35 is elevated proximally and relates to innate immunity, whereas the other is enriched distally,  
36 encoding lipid metabolism and antigen presentation. Intermediately positioned cells express  
37 low levels of both graded programs and show increased clonogenic potency in vitro, relating  
38 cell-plasticity to location in each branch. Single-cell RNA-sequencing following lineage-tracing  
39 revealed the sequential and postnatal establishment of the gradients in common epithelial  
40 progenitors. *Fgfr2b* is distally enriched and its postnatal inactivation reduces distal gene  
41 expression and expands proximal genes into distally located cells. This suggests a central role  
42 of FGFR-signaling in tissue-scale airway patterning.

43

44

45

46

47

48

49

50

51

52

53

54

55

56

57

58

## 59 Introduction

60 The airway epithelium functions as a pathogen barrier and as a seamless conduit of air to the  
61 alveoli, where gas exchange takes place<sup>1</sup>. The airway network is anatomically divided into the  
62 extra-lobar (trachea and bronchi) and intra-lobar compartments<sup>2</sup> with distinct cell  
63 compositions. Basal cells, for example, are localized in the extra-lobar compartment of the  
64 mouse airways<sup>3</sup> and gradually decrease along the proximal-distal (PD) axis of the human intra-  
65 lobar airways<sup>4</sup>. Advances in single-cell RNA Sequencing (scRNA-Seq) resulted in the detailed  
66 characterization of the epithelial cell heterogeneity in mouse and human trachea, capturing  
67 the gene expression profiles of many cell types with single cell resolution<sup>5-7</sup>. It was only  
68 recently shown that specific cell types expressing secretoglobins, mucins and surfactant  
69 proteins are differentially distributed in distinct regions of human small airways<sup>7</sup>, even though  
70 pioneering experiments have reported differential expression for a few of these markers two  
71 decades ago<sup>8</sup>. The various epithelial cell types, distributed along the airways, are coordinated  
72 to accomplish distinct functions, creating the mucociliary escalator<sup>9</sup>. Secretory cells contribute  
73 to respiratory homeostasis by detoxification of inhaled xenobiotics<sup>10</sup> and by secretion of  
74 mucins, antimicrobial proteins and cytokines upon exposure to pathogens<sup>11-13</sup> 8, 14. Mucus and  
75 inhaled particles are propelled out of the airways by numerous multiciliated cells<sup>15-17</sup>. In  
76 homeostasis, secretory club cells self-renew and produce ciliated cells<sup>18, 19</sup>. Upon injury they  
77 can reconstitute the airways and even the alveolar epithelium<sup>9, 20</sup>. Several subsets of airway  
78 secretory cells contribute to tissue repair upon airway or alveolar injury. These include the  
79 variant (v) club cells<sup>21, 22</sup>, the *Upk3a*<sup>pos</sup> (u) club cells<sup>23</sup> located near neuroendocrine cells (NE),  
80 the bronchioalveolar stem cells (BASCs) in terminal bronchioles (TBs)<sup>22, 24, 25</sup>, the  $\beta$ 4<sup>pos</sup>  
81 CD200<sup>pos</sup> Scgb1a1<sup>pos</sup> cells in distal airways<sup>20</sup> and cells in activated transitional states (ADI<sup>26</sup>,  
82 DAPT<sup>27</sup> and PATS<sup>28</sup>). The existence of such a large variety of airway secretory cell states  
83 indicates that they are highly heterogeneous and capable of adopting distinct stem cell  
84 characteristics. Several of the described lung secretory cell types emerge postnatally, but their  
85 spatial coordinates in the tissue, lineage relationships and differentiation mechanisms are  
86 poorly understood.

87 We focused on the branched airway secretory epithelium in homeostasis and during  
88 development and captured the gene expression profiles and cell topology. Our work reveals  
89 a general airway secretory gene expression program in addition to at least two complementary  
90 and partially overlapping ones. These programs are genetically determined, established  
91 postnatally in an initial embryonic progenitor and relate to cell-topology along the branch PD-  
92 axis to define distinct functional characteristics, which are maintained in vitro in different types  
93 of secretory cells. We show that FGF-signalling in the distal branches is a major determinant  
94 of the spatial patterning of the airways, controlling genes involved in surfactant biosynthesis,

95 mitochondrial function, ribosomal biogenesis and immune responses. Our study provides a  
96 detailed characterization of the lung secretory epithelium in time and space, suggests  
97 topology-related cell functions and provides mechanistic information on the dynamic nature of  
98 their regulation.

99

## 100 **Results**

### 101 **Analysis of epithelial cell heterogeneity in the adult lung**

102 To analyse the main secretory cell types in the mouse lung, we first isolated them from the  
103 lungs of a double transgenic reporter strain expressing a green fluorescence protein (GFP) in  
104 the alveolar secretory epithelium (Sftpc-GFP)<sup>29</sup> and a tamoxifen-inducible red fluorescence  
105 protein (tdTomato)<sup>30</sup> in the airway secretory cells<sup>19</sup> (Scgb1a1creER-Ai14). In addition, we  
106 used Pdpn antibodies in conjunction with the tdTomato fluorescence to label and isolate a  
107 third fraction because we had noticed that the cell surface protein Pdpn is expressed in basal  
108 cells and in secretory cells of the proximal airways<sup>31</sup> (Fig. 1A).

109 We induced recombination in adult mice and three days later, we FACS-sorted the labelled  
110 cells for droplet-based scRNA-Seq (Fig. 1B, Extended Data Fig. 1A). We generated and  
111 analysed 12030 high-quality cDNA libraries (Extended Data Fig. 1B-C). The UMAP (Uniform  
112 Manifold Approximation and Projection) plot<sup>32</sup> and differential expression of marker genes in  
113 the clusters were consistent with the FACS-sorting criteria (Extended Data Fig. 1D-E). We  
114 annotated clusters according to the positivity for known lung epithelial cell markers (Fig. 1C-  
115 D, Extended Data Fig. 1F, Suppl. Table 1). A small cluster (cl-4) contained Foxj1<sup>pos</sup>  
116 multiciliated cells found in the Scgb1a1creER-Ai14<sup>pos</sup> Pdpn<sup>neg</sup> cell sorting fraction (99.8%),  
117 suggesting that the modest Scgb1a1 expression (Extended Data Fig. 1G) in ciliated cells was  
118 sufficient to induce recombination in few ciliated cells. As expected, cluster-4 cells uniquely  
119 expressed many genes related to cilium organization and function (GO:0044782) (Suppl.  
120 Table 2).

121 The Scgb1a1<sup>pos</sup> airway secretory cells are separated into three clusters. Cluster-5 contains  
122 mainly Scgb1a1-Ai14<sup>pos</sup> Pdpn<sup>pos</sup> sorted cells that also expressed high levels of the proximal  
123 airway cell markers Scgb3a1 and Scgb3a2<sup>8</sup> (Fig. 1D). We annotated these cells as S1  
124 (Secretory 1). Cluster 1 (cl-1) was almost exclusively (99.2%) composed of Scgb1a1creER-  
125 Ai14<sup>pos</sup> Pdpn<sup>neg</sup> cells (Extended Data Fig. 1D-E), which were also positive for Kdr<sup>33</sup> (Extended  
126 Data Fig. 1F) and previously reported epithelial cell markers. We annotated these cells as S2.  
127 Cluster-3 contained 92.4% of Scgb1a1creER-Ai14<sup>pos</sup> Sftpc-GFP<sup>pos</sup> double-positive (DP) cells.  
128 The rest of these cells were evenly distributed among the two alveolar secretory (AEC2)

129 clusters 0 and 2 (Extended Data Fig. 1D-E). This suggested that some AEC2s also express  
130 *Scgb1a1*. Cl-3 cells co-expressed moderate levels of S2 and AEC2 markers. However, we did  
131 not detect unique markers (Fig. 1C), suggesting that they represent an intermediate cell state  
132 between airway and alveolar secretory cells.

133 The clusters of alveolar secretory cells AEC2 (cl-0, AEC2a) and (cl-2, AEC2b) differed in *Lyz1*  
134 expression in the AEC2b cluster (Extended Data Fig. 1H), as reported previously<sup>34</sup>. Both  
135 alveolar clusters (AEC2a and b) expressed high levels of genes involved in lipid biosynthesis  
136 (GO:0008610) and lipid transport (GO:0006869), in addition to genes implicated in the  
137 regulation of leukocyte activation (GO:0002694), such as various MHC class-II genes involved  
138 in antigen presentation (Suppl. Table 2). Overall, this analysis defined two airway secretory  
139 cell types, a group of *Scgb1a1*<sup>pos</sup> *Sftpc*<sup>pos</sup> cells, two secretory alveolar cell identities that differ  
140 in the expression of *Lyz1* and a cluster of *Foxj1*<sup>pos</sup> ciliated cells.

141

## 142 **Gene expression patterns suggest distinct secretory cell functions**

143 The continuous arrangement of the lung secretory cells from the S1 to the AEC2b cluster in  
144 the UMAP-embedding suggested intermediate expression levels of cell-specific gene  
145 programs in the cells bridging the main bodies of each cluster. To explore the transcriptional  
146 heterogeneity along this continuum, we used diffusion maps<sup>35</sup> and trajectory analysis (Fig.  
147 2A), similar to the pseudotemporal cell ordering along a developmental trajectory. We ordered  
148 equal numbers of randomly selected cells from each cluster and identified 1563 differentially  
149 expressed genes (DEGs) along the trajectory. These genes can be grouped into 10 stable  
150 modules (Fig. 2B, Suppl. Table 3). The aggregated gene expression scores confirmed groups  
151 of co-expressed genes, which are either gradually reduced from S1- to S2-cells (modules-5  
152 and-2) and gene programs graded in the opposite orientation (modules-4 and -1). Module-3  
153 genes showed equal activation in both S1 and S2, but also in ciliated cells, representing a  
154 general airway gene expression program. Modules -7 and -8 were enriched in S2 cells, but  
155 only module-7 was expressed in ciliated cells. Module-9 genes were enriched in all but the S1  
156 cells and modules-10 and -6 in all but S2 cells (Extended Data Fig. 1I). This analysis reveals  
157 shared, distinct and graded gene expression programs in the adult airways. Gene ontology  
158 (GO) analysis of the modules suggested selectively enriched biological processes for each  
159 cell type (Fig. 2C-D, Suppl. Table 3). For example, module-5 includes genes related to innate  
160 immunity regulation (GO:0002682, *Reg3g*<sup>36</sup>, *Ltf*, *Bpifb*<sup>137</sup> *P2rx4*<sup>38</sup>, *Il13ra1*<sup>39</sup> and *Mfge8*<sup>40</sup>) and  
161 its expression is restricted to S1-cells only. Module-2 genes are also highly expressed in S1  
162 cells but are gradually decreased in cells of the S2 and DP clusters. These genes encode  
163 various metabolic enzymes (e.g., *Gsta1*, *Acs11* and *Gstm5*), cytokines (*Cxcl1*, *Cxcl2*, *Cxcl5*

164 and *Cxcl17*) and interferon-induced antiviral proteins (*Ifitm1*, *Ifitm3* and *Ifit1*), suggesting  
165 differential functions of secretory cell-types in response to chemicals (GO:0070887) and  
166 viruses (GO:0034097). This is also supported by previous functional analyses of few module-  
167 2 genes. Transcription factor encoding genes (TF) *Six1*<sup>41</sup> and *Spdef*<sup>42</sup> have been implicated  
168 in airway inflammation and *Irf7* was upregulated in airway secretory cells upon RSV infection<sup>43</sup>.

169 Module-3 genes are uniformly expressed in S1- and S2- cell clusters and primarily encode  
170 metabolic and detoxification enzymes (e.g., *Cyp2f2*, *Aldh1a1* and *Gsta3*), supporting the  
171 notion that a general function of airway secretory epithelium is to respond to xenobiotics  
172 (GO:0009410, GO:0006749) to detoxify inhaled air.

173 The cells in the S2-cluster selectively express module-7 genes, which relate to the general  
174 term cellular development (GO:0048869). This module contains developmental genes, such  
175 as *Shh*<sup>44-46</sup> and the negative regulators of airway inflammation *Kdr*, *Sema3e*, *Sema3a* and  
176 *Nr1d1*<sup>33, 47-49</sup>.

177 Cells in the DP and in both AEC2 clusters show a selective and gradual upregulation of  
178 module-1 genes, which were decreased in the S2 and S1 clusters. Module-1 contains genes  
179 encoding kinases like *Fgfr2* and *Lrrk2*, required for maintenance and function of the alveolar  
180 type 2 cells<sup>50-53</sup>. Additionally, *Atp8a1*, *Abca3* and the Rab-family genes *Rab27a* and *Rab34*  
181 relate to phospholipid transport (GO:0051050) and vesicle trafficking.

182 Finally, the cells in the two alveolar epithelial clusters upregulate module-4 genes, which  
183 encompasses known regulators of alveolar cell differentiation and maintenance, like *Etv5*<sup>54</sup>  
184 and *Nkx2-1*<sup>55, 56</sup>, together with genes related to lipid biosynthesis (GO:0008610) and transport  
185 across the plasma membrane (GO:0098739). Notably, the enriched expression of *H2-Eb1*,  
186 *H2-DMb1*, *H2-Dma*, *H2-Aa* and *H2-Ab1* relating to the MHC class-II complex assembly  
187 (GO:0002399) suggests a selective role of alveolar secretory cells in antigen-presentation to  
188 immune cells.

189 This analysis identifies several gene programs that are shared but also differentially expressed  
190 among the secretory cell clusters. The expression intensity of these programs along a  
191 continuum of cell states suggests that prominent biological processes of the lung epithelium  
192 relating to immune responses, detoxification, lipid biosynthesis and ion transport are  
193 segregated in the airway and alveolar compartments but are also expressed in a graded  
194 fashion along the secretory trajectory.

195

## 196 **Spatial analysis of the secretory cell trajectories in the airways**

197 To further investigate the gene expression gradients along the cell trajectory between S1 and  
198 AEC2b cell-states we focused on the spatial analysis of marker genes in the airways. We first  
199 selected a panel of 18 DEGs (Fig. 2E) and detected their transcripts *in situ* by SCRINSHOT<sup>57</sup>.  
200 We quantified the signals in 5906 manually segmented airway epithelial cell-ROIs in distinct  
201 airway positions, based on the stereotyped airway branching pattern of the left lung-lobe<sup>2</sup> (Fig.  
202 2F, Extended Data Fig. 2A). Hierarchical clustering of the 3096 secretory cells showed high  
203 expression of module-5 genes, *Scgb3a1* and *Muc5b* in the proximal domains (P and I1),  
204 whereas module-1 genes, *Sftpb* and *Atp8a1* were more abundantly expressed in the distal  
205 domains I3 and D. Interestingly, cells in the intermediately located I2 domain co-expressed  
206 lower levels of both module-1 and module-5 markers (Fig. 2F), resembling the opposing  
207 graded expression of module 1 and module 5 genes along the secretory cell cluster trajectory  
208 (Fig. 2E). This suggests that secretory cell-states S1 and AEC2, expressing high levels of  
209 unique markers, are located at the proximal and distal sites of each airway branch and cells  
210 in intermediate branch positions are in an intermediate cell-state expressing moderate levels  
211 of both the S1 and AEC2 gene modules. To further test this hypothesis, we analysed protein  
212 expression levels by immunofluorescence co-staining for few S1 and S2 markers (*Scgb3a1*,  
213 *Muc5b*, *Hp* and *Atp8a1*) relative to E-cadherin, which is homogeneously expressed in the  
214 epithelium (Extended Data Fig. 2B-C). Also, this analysis revealed expression gradients,  
215 where S1 markers were highest in the P domain and gradually reduced in the I (1-3) and D  
216 domains. The relative levels of the S2 markers *Hp* and *ATP8a1* formed an opposing gradient,  
217 highest in the D-domain and gradually reducing towards the P-domain.

218 Many of the module-5 and -2 genes relate to innate immune responses and they are  
219 predominantly expressed in proximal airway S1-cells of adult mice. We, therefore, examined  
220 if environmental factors or the lung microbiome sets their basal expression patterns. We  
221 selected antibodies against two S1 and two S2 markers to determine relative protein levels in  
222 germ-free and pathogen-free conditions relative to E-Cadherin. The expression levels of these  
223 markers showed similar distribution regardless of the different environmental exposures (Fig.  
224 3A-D). This suggests that the localized gene expression programs of epithelial secretory cells  
225 are initially specified genetically. Several genes in these programs are known to be further  
226 activated upon infections, tissue damage or inflammatory disease<sup>12</sup>. The graded expression  
227 values in the spatial analysis (Fig. 2F) and in the scRNA-Seq diffusion maps (Fig. 2E) indicates  
228 that the trajectory of secretory cells reflects the PD pattern of gene expression in the airway  
229 secretory epithelium (Fig. 3E). The expression values may thus provide a conceptual ruler for  
230 positioning airway secretory epithelial differentiation states along each branch. The unaltered



231 peaks and valleys of S1 and S2 marker expression in lungs of germ-free mice suggest that  
232 airway cell patterning can be influenced but is not initially dependent on microbes.

233

### 234 **Spatial analyses of the Scgb1a1<sup>pos</sup> Sftpc<sup>pos</sup> cells**

235 We further examined topology-related gene expression markers in rare secretory cell identities  
236 like the double positive (DP) Scgb1a1<sup>pos</sup> Sftpc<sup>pos</sup> (DP) cells using an additional SCRINSHOT  
237 probe panel of 16 DEGs along the secretory trajectory, together with the neuroendocrine (NE)  
238 cell markers, *Ascl1* and *Calca*. We confirmed the previously reported localization of the DP-  
239 cells in bronchioalveolar-duct junctions (BADJs) and close to NEBs<sup>58</sup> (Fig. 3F, Extended Data  
240 Fig. 2D). We found them mainly at airway terminal bronchioles (TB) (42.3%) and to a lesser  
241 extend in the alveolar compartment (12.5%) close to BADJs. A small fraction of DP cells  
242 (7.1%) was close to NE cells, within a 20  $\mu$ m radius surrounding the neuroepithelial body  
243 (NEB) borders. We found that cell-ROIs in the TB-part of BADJs express higher levels of the  
244 S2- (module-3) than AEC2-enriched markers (module-1 and -4), whereas DP-cell-ROIs in the  
245 alveolar part of BADJs and alveoli showed an opposite profile. Immunofluorescence stainings  
246 for few protein markers confirmed the SCRINSHOT results (Extended Data Fig. 2E). We  
247 conclude that DP-cells are detected in three distinct locations along the epithelial PD-axis,  
248 expressing high levels of S2 or AEC2 markers, depending on their position. The DP-cells in  
249 the vicinity of NEBs may correspond to v-club cells<sup>21, 22</sup> and were found more distantly from  
250 NEs than the *Upk3a*<sup>pos</sup> u-club cells<sup>23</sup> (Extended Data Fig. 2F). We conclude that even rare  
251 secretory cell types express graded levels of S2 and AEC2 cell markers depending on their  
252 position in the airway tree. Their distribution and distinct identities may reflect unique signals  
253 from the NEB microenvironment, such as Notch-signalling<sup>59</sup>.

254

### 255 **In vitro differentiation potentials along the airway epithelial trajectory**

256 The graded activation levels of distinct gene expression modules reflect a continuum of cell  
257 states along the airway with possible functional differences in the proximal, intermediate and  
258 distal regions. As a first test of this hypothesis, we isolated cells from double reporter mice (as  
259 in Extended Data Fig.1A) and cultured them in Matrigel together with cells from a mouse lung  
260 fibroblast cell-line (MLg-2908), as described before<sup>60, 61</sup> to compare their cell proliferation and  
261 differentiation potential. The proximal-domain cells correspond to the sorted Scgb1a1creER-  
262 Ai14<sup>pos</sup> Pdpn<sup>pos</sup> fraction, the Scgb1a1creER-Ai14<sup>pos</sup> GFP<sup>pos</sup> (DP) to the airway distal end and  
263 the Scgb1a1creER-Ai14<sup>pos</sup> Pdpn<sup>neg</sup> cells derive from intermediate and distal airways. We  
264 initially assessed cell clonogenic potential and found that the two Scgb1a1creER-Ai14<sup>pos</sup>  
265 GFP<sup>neg</sup> cells fractions were more potent than DP-cells under our culture conditions (Fig. 4 A).



266 Cultured cells produced three colony-types as previously described<sup>60, 62</sup>. The large cystic  
267 colonies (type-A: bronchiolar) expressed the airway secretory markers *Scgb3a1*, *Muc5b*, *Hp*  
268 and *Scgb1a1* in addition to the ciliated cell marker acetylated tubulin<sup>63</sup> and the basal cell  
269 marker *Krt5*<sup>64</sup> and *Pdpr*. The dense colonies (type-C: alveolar) were positive for the alveolar  
270 markers *Sftpc* and *Ager* and the type-B (bronchioalveolar) colonies showed mixed morphology  
271 and expression of both bronchiolar and alveolar markers. The *Pdpr*<sup>neg</sup> cells produced  
272 predominantly bronchioalveolar and alveolar colonies, in contrast to the mainly bronchiolar  
273 ones of *Pdpr*<sup>pos</sup> and the exclusively alveolar ones of *GFP*<sup>pos</sup> cells (Fig. 4B-E).

274 Our results suggest that the airway secretory epithelial cells have different characteristics  
275 relating to their topology and that they retain them *in vitro*. The increased potency of *Pdpr*<sup>neg</sup>  
276 cells to produce bronchioalveolar colonies with positive cells for all identified airway secretory,  
277 ciliated, basal and alveolar markers (Fig. 4A) suggests that S2 cells represent a  
278 heterogeneous cell population in intermediate and distal airways with higher plasticity, than  
279 those of S1 proximal airway cells and DP-cells, at least under the uniform *in vitro* co-culture  
280 conditions.

281

## 282 **Airway epithelial cells mature postnatally**

283 To identify when the different airway cell states are specified and determine potential lineage  
284 relationships, we induced labelling of embryonic *Scgb1a1*<sup>pos</sup> cells with a farnesylated GFP  
285 variant (*Scgb1a1creER-fGFP*)<sup>19</sup> and lineage-traced them. We induced recombination at the  
286 onset of *Scgb1a1* expression<sup>19</sup>, on embryonic day (E) 16 and FACS-sorted labelled progeny  
287 cells at E19.5 and postnatal days P2, P21 and P60 for full-length scRNA-Seq<sup>65</sup> (Fig. 5A).

288 We analysed 354 libraries (Extended Data Fig. 3A) using diffusion maps and trajectory  
289 analysis and found four distinct trajectories stemming from cl-0 composed of immature  
290 secretory cells from E19.5 and P2 lungs. The trajectories end in four mature clusters  
291 containing cells from P21 and P60 lungs (Fig. 5B, Extended Data Fig. 3B). According to DEG  
292 analysis and marker gene expression Cluster 3 (cl-3) corresponds to DP, (cl-1) to S2, (cl-2) to  
293 S1 and (cl-4) to ciliated cells (Extended Data Fig. 3C, Suppl. Table 5) in the adult-cell dataset.  
294 Differential expression analysis between the clusters revealed a high level of *Upk3a* and  
295 *Krt15*<sup>36</sup> in the perinatal cluster. These cells also upregulate *Ccnd2* implicated in injury  
296 repair<sup>66,67</sup>, the WNT receptor *Fzd1*, the autophagy regulator *Itm2a*<sup>68</sup> and the AEC marker  
297 *Ager*<sup>69</sup>. The enriched gene sets of the mature cell clusters largely overlap with those of the  
298 adult dataset (Fig. 5C, Extended Data Fig. 3C, Suppl. Table 5).

299 Next, we used GO-analysis to identify enriched biological processes in the clusters (Extended  
300 Data Fig. 3D and Suppl. Table 6) and scored the cells along the trajectories based on the  
301 expression of the corresponding genes. We found that the perinatal immature cells highly and  
302 transiently express ribosomal genes, indicating high levels of mRNA translation (GO:0006412)  
303 and ribosome biogenesis (Fig. 5D, Extended Data Fig. 3D, Suppl. Table 6). The mature airway  
304 secretory cell gene modules, encoding detoxification, oxidative stress responses, xenobiotic  
305 and lipid metabolism were gradually established along the S1 and S2 trajectories but not in  
306 DP-cells (Fig. 5D). This is represented by the expression levels of genes encoding  
307 representative enzymes, such as the *Aldh1a1*, *Fmo2* and *Gsta3* (Extended Data Fig. 3E).  
308 Interestingly, the representatives of the innate immunity term (GO:0002682) *Scgb3a1*, *Tff2*  
309 and *Muc5b* reached high expression only at the very end of the S1-trajectory (Extended Data  
310 Fig. 3F). This suggests either slower establishment of the S1 gene expression program or that  
311 mature cells from intermediate and distal domains were erroneously placed along that  
312 trajectory. To test this, we also analysed the cells according to the actual developmental age  
313 of their isolation and found that the P60 cells have generally higher expression levels of the  
314 markers than those isolated at P21 (Extended Data Fig. 3G). The cells along the DP-trajectory  
315 gradually increase their ability for lymphocyte-mediated immunity (GO:0002449), upregulating  
316 the *Cd74*, *Ctsc*, *Hc*, *Emp2*, *H2-Aa* and *H2-Ab1*. The middle part of the DP-trajectory contains  
317 perinatal cells that likely contribute to the local extracellular matrix (ECM) organization  
318 (GO:0030198), expressing high levels of genes like the *Col4a2*, *Spock2* and *Matn4* (Extended  
319 Data Fig. 3H).

320 In summary, we showed that different clusters of adult airway secretory cells derive from an  
321 embryonic secretory *Scgb1a1*<sup>pos</sup> population. Differentiating cells mature postnatally, acquiring  
322 their functional characteristics during the first three weeks after birth (Fig. 5E). Overall, the  
323 perinatal airway epithelium shows high ribosomal biogenesis, gradually decreasing over time.  
324 The gene programs of innate immunity (S1-trajectory) are established later than those  
325 involved in xenobiotic metabolism and reduction of reactive lipid aldehydes (S1- and S2-  
326 trajectories), suggesting that cell specification programs are activated sequentially. In the  
327 developing distal lung, the differentiating DP cells transiently contribute to ECM composition  
328 and gradually acquire the expression of antigen presentation genes, which are also expressed  
329 by the adult AEC2s.

330

### 331 **Fgfr2 promotes distal differentiation programs and restricts the proximal ones**

332 Fibroblast growth factor (FGF) signalling is crucial for lung epithelial branching<sup>70</sup> and is later  
333 required for AEC2 differentiation and maintenance<sup>50-52, 71-73</sup>. Our gene expression analysis

334 showed that *Fgfr2* is also expressed in the adult epithelial cells belonging to gene module-1,  
335 which shows high levels in AEC2 and DP-cells and gradually decreases in S2 and S1 airway  
336 cells (Suppl. Table 3, Extended Data Fig. 4A). We further detected *Fgfr2* expression in the  
337 perinatal airway secretory cells (Extended Data Fig. 4B) and differentially localized *Fgfr2*  
338 protein by immunofluorescence (Extended Data Fig. 4C) in P2 lung sections. Co-stainings  
339 with a *Fgfr2* $\beta$ (IIIb)-Fc chimeric protein to detect the spatial distribution of *Fgfr2*-ligands  
340 together with *Fgfr2* showed a punctate staining for the ligand, which was higher around the  
341 TBs and distal airway epithelial cells and lower at proximal airways. This suggested a more  
342 robust pathway activation in the distal airway regions<sup>73</sup>.

343 To examine if *Fgfr2* signalling has any role in the postnatal establishment of gene expression  
344 gradients along the airway epithelium, we deactivated the receptor just after birth. We induced  
345 tamoxifen-mediated *Fgfr2*-inactivation<sup>74</sup> in the *Scgb1a1* cells (*Scgb1a1creER-Fgfr2KO*) and  
346 utilized *Rosa-loxTomato* expression<sup>30</sup> to detect recombination, and presumed mutant cells.  
347 After three Tamoxifen injections (P1-P3), we analysed the lungs at P7 by scRNA-Seq and  
348 histology (Fig. 6A). We clustered and annotated 9911 scRNA-Seq libraries from *Epcam*<sup>pos</sup>  
349 cells from wildtype (library-1), *Epcam*<sup>pos</sup> from mutant (library-2) lungs and *Epcam*<sup>pos</sup> RFP<sup>pos</sup>  
350 cells from mutant lungs (library-3). The UMAP-plot was consistent with the FACs-sorting  
351 criteria and showed that the inactivation did not affect *Fgfr2* expression in basal and AEC2  
352 cells (Extended Data Fig. 4D-G). The alveolar (cl-0, -1, -5), basal (cl-7), NE (cl-8), ciliated (cl-  
353 6) and S1 (cl-4) clusters were composed of intermingled wildtype and mutant cells, indicating  
354 that there is no significant effect of the *Fgfr2* inactivation on these cells. In cluster-2, composed  
355 of S2 cells, RFP positive and negative cells showed a conspicuous separation, but we also  
356 detected *Fgfr2* transcripts in the cells from the RFP<sup>pos</sup> libraries (Extended Data Fig. 4E),  
357 suggesting escaper cells, which recombined the *Rosa26R-Ai14* (RFP) but failed to deactivate  
358 both *Fgfr2* alleles. This partial *Fgfr2* inactivation was also validated by antibody stainings  
359 (Extended Data Fig. 4H) and led us to filter out the S1- and S2-cells with *Fgfr2* transcripts from  
360 library-3 before further analyses to reduce noise.

361 We clustered equal airway secretory cell numbers from wildtype (lib-1) and mutant (lib-3)  
362 libraries and found eight clusters. These correspond to a single S1-cluster composed of  
363 wildtype and mutant cells, two wildtype S2- (WT S2-1 & WT S2-2) and three mutant S2-  
364 clusters (KOS2-a & KO S2-b), of which one expresses elevated levels of S1 markers (KO  
365 S1/2). In addition, we identified wildtype and mutant DP cell clusters (WT DP & KO DP)  
366 according to their DEGs (Fig. 6B, Extended Data Fig. 5A, Suppl. Table 7B-C). There was no  
367 clear pairwise correlation of the S2 and DP between the wildtype and mutant clusters  
368 (Extended Data Fig. 5B-C). To avoid comparing irrelevant cells, we compared all wildtype to  
369 all mutant airway secretory cells, regardless of clustering and identified 240 statistically

370 significant DEGs, which we categorized based on GO-analysis and previous knowledge (Fig.  
371 6C-D, Suppl. Table 7D-F and 8). We also related the expression levels of the affected genes  
372 in the *Fgfr2* inactivation experiment with their levels in the lineage-tracing experiment  
373 (Extended Data Fig. 5D). We included all previously defined epithelial cell types regardless of  
374 genotype (Extended Data Fig. 5E) to identify both possible general, temporal and cell-type  
375 specific differentiation defects.

376 We found a prominent reduction of AEC2 marker levels (*Sftpc*, *Napsa*, *Cd74*) accompanied  
377 by increased expression of the AEC1 TF *Hopx*<sup>75</sup> (Fig. 6C). Mutant cells also upregulated a  
378 large number of nuclear-encoded mitochondrial genes encoding complex I, III, IV and V  
379 components, sodium channel genes (*Commd3*, *Scnn1a*, *Scnn1b*<sup>76</sup>) and genes relating to  
380 autophagy and vesicle trafficking (*Creg1*<sup>77</sup>, *Vamp8*, *Vamp5*<sup>78</sup>, *Rab25* and *Rabac*), which are  
381 all normally expressed by P42 AEC1s<sup>79</sup> (Fig.6C, Extended Data Fig. 5E and 6A-C). The  
382 senescence- and cell-survival-related genes *Cdkn1a* (p21)<sup>80, 81</sup>, *Bax* and *Bag1*<sup>82</sup> are also  
383 enriched in AEC1s and become up-regulated in mutant secretory cells. Interestingly, *Hopx*,  
384 *Vamp5*, *Creg1* and *Scnn1b* are also detected at low levels in adult wild-type S2 cells, indicating  
385 their propensity to further activate AEC1 programs upon signalling (Extended Data Fig. 6D).  
386 This suggests that *Fgfr2* activation in distal airway cells up-regulates AEC2-related genes that  
387 are responsible for surfactant biosynthesis and lamellar body formation (Fig. 6D) and directly  
388 or indirectly down-regulates numerous AEC1 genes, that relate to mitochondrial function, ion  
389 homeostasis, vesicle trafficking and cell-survival. *Fgfr2*-inactivation also altered the  
390 expression of several genes involved in lipid metabolism, trafficking and adipogenesis (Suppl.  
391 Table 7F).

392 *Fgfr2*-inactivation in the airways also caused increased expression of ECM protein-encoding  
393 genes (*Eln*, *Mgp* and *Mfap4*) which are normally transiently expressed along the DP-cell  
394 trajectory (Extended Data Fig. 5D) and in developing AEC1 and AEC2 (Extended Data Fig.  
395 6C). Similarly, mutant cells failed to downregulate numerous ribosomal-subunit genes, which  
396 are highly expressed in all immature lung epithelial cells and gradually decrease as  
397 specification proceeds (Extended Data Fig. 5D, 6C). These findings suggest that *Fgfr2* is  
398 required for the normal progression of differentiation in distal airway epithelial cells.

399 The most significantly reduced TF in mutant S2-cells is *Myc*, which is normally highly  
400 expressed in immature airway secretory cells and becomes downregulated in mature S1 and  
401 S2 (Extended Data Fig. 5D, Suppl. Table 7G). Other significantly changed TFs are the down-  
402 regulated *Atf4* and *Ets1* and the up-regulated *Cebpb*.

403 An intriguing phenotype of *Fgfr2*-inactivation is the appearance of a new cell cluster of S2-  
404 cells (cl-4, S1/S2), which expressed increased levels of S1 innate immunity marker genes,

405 such as *Tff2*, *Bpifb*, *Reg3g* and the *Scgb3a1* proximal cell marker (Fig. 6C, E). This suggested  
406 that *Fgfr2* activation in distal cells restricts the S1-related gene expression program. We  
407 confirmed this observation by antibody stainings in mutant lungs, where *Scgb3a1* protein was  
408 detected in distal airway epithelial cells co-expressing *Ager* (Fig. 6F). Similarly, *Muc5b*  
409 expansion was observed in adult *Fgfr2*-mutant distal airway secretory cells upon naphthalene-  
410 induced injury<sup>83</sup>.

411 To elucidate potential cell-autonomous or indirect mechanisms involved in this restrictive  
412 function of *Fgfr2*-signaling, we interrogated the transcriptomes of mutant and wildtype cells for  
413 the expression of genes encoding *Vegfa*, its receptor *Kdr* and *Ryk*, a Wnt co-receptor. These  
414 three genes are normally expressed in secretory cells and are required to restrict the proximal  
415 gene expression programs and mucus metaplasia upon airway epithelial injury<sup>33, 84</sup>. We found  
416 that the levels of both *Vegfa* and *Ryk* were reduced in the *Fgfr2* mutant DP- and S2-cells (Fig.  
417 6G), suggesting that *Fgfr2* activation in distal cells may also restrict the expression of proximal  
418 genes by activating the expression of relaying signals and receptors. We also observed a  
419 decrease in the levels of *Shh*<sup>72</sup> in *Fgfr2* mutant DP cells (Fig. 6G), suggesting altered paracrine  
420 signalling from the distal epithelial cells to endothelial and other mesenchymal cell types of  
421 the mutant lungs.

422 In summary, perinatal *Fgfr2*-signalling in airway secretory epithelium promotes progression  
423 towards differentiation, specifies the levels of S2 and DP cell programs and at least indirectly  
424 changes airway patterning by activating genes encoding signals and receptors.

425

## 426 Discussion

427 Our large-scale scRNAseq and spatial analysis of airway secretory cells in the adult lung  
428 suggests that cell characteristics are defined by a uniformly activated gene program relating  
429 to cell responses to xenobiotics and two opposing and partially overlapping graded programs.  
430 These programs encode genes relating to innate immunity, cytokine production and response  
431 to cytokines in proximal regions and lipid synthesis, surfactant production and antigen  
432 presentation in the distal ones (Fig. 7A). Similarly, recent reports showed graded expression  
433 patterns of a few distal markers in the distal human airway epithelium<sup>7, 85, 86</sup>. Future  
434 experiments are needed to investigate the presence of opposing gradients along the airway  
435 network in human donor samples to establish if the mouse patterns are conserved. Why may  
436 these developmentally controlled gene expression gradients be relevant for airway structure  
437 and function? Firstly, their slopes correlate with the tapering of airway branches, suggesting  
438 that graded gene expression programs may control branch size and shape, facilitating  
439 seamless airflow to the alveolar compartments. Second, the differentially localized expression



440 of different types of immunity programs suggests that proximal cells are better endowed to  
441 present immediate innate responses and cytokine signalling. In contrast, the distal ones are  
442 more specialized for antigen presentation. The compartmentalization of immune functions  
443 correlates with the higher expression of mucin coding genes and greater abundance of  
444 multiciliated cells in proximal regions, where pathogens become trapped, targeted by  
445 antimicrobial peptides and propelled out of the tubes. Escaping pathogens may be further  
446 detected by distal airway cells, internalized and presented to lymphocytes, activating slower  
447 but long-lasting immune responses. Third, the gradients may reflect developmentally  
448 controlled positioning of cells expressing lower levels of specification genes in intermediate  
449 positions of each branch in the airway network. Such cells with higher plasticity and increased  
450 differentiation potential may efficiently and rapidly repair local damage caused by pathogens  
451 and inhaled toxic substances. Our *in vitro* culture experiment, comparing the differentiation of  
452 S1, S2 and DP cells, supports this notion, but our transcriptome analysis failed to define any  
453 specific markers genes for such cells, precluding their labelling and isolation at present.

454 The lineage tracing analysis of the airway secretory cells and the meta-analysis of the  
455 GSE149563<sup>79</sup> dataset enriched for alveolar-epithelial cells (Extended Data Fig. 5D, 6C)  
456 indicate that immature secretory cells downregulate the high expression of genes encoding  
457 ribosomal proteins as they become specified postnatally. Similarly immature secretory cells  
458 downregulate genes coding for ECM proteins as they reach the end of their differentiation  
459 trajectory. The expression of these genes is retained longer in DP-cells, where it becomes  
460 downregulated later. Immature secretory cells first upregulate a detoxification-related genetic  
461 program, which is retained and increased in S1- and S2- cells but becomes repressed in DP  
462 cells. Innate immunity-, lipid metabolism- and lymphocyte-mediated immunity gene programs  
463 become selectively established later in S1- and S2-cells. These results reveal common and  
464 distinct cellular mechanisms of secretory cell-type differentiation. Their sequential emergence  
465 suggests that they are hierarchically coupled.

466 The scRNAseq analysis of conditional *Fgfr2*-inactivation in the postnatal airway secretory  
467 epithelium (Fig. 7A) suggests a central role for distal *Fgfr2*-signalling in differentiation  
468 progression and airway patterning. First, the graded distal programs encoding surfactant  
469 production and endosomal vesicle traffic, which are normally expressed in DP and S2 cells,  
470 become severely reduced. Instead, DP- and distal S2-cells upregulate AEC1s gene  
471 expression programs, including genes encoding mitochondrial proteins and autophagy (Fig.  
472 7B, Suppl. Fig. 1). This phenotype is similar to the one generated by the perinatal *Fgfr2*-  
473 inactivation in AEC2s, which reprograms them to AEC1s<sup>51</sup>. Second, our analysis reveals a  
474 long-lasting role of *Fgfr2*-signalling in all S2-cells, because the timed repression of ribosomal  
475 and ECM gene expression remains active in all S2-cells. This suggests that *Fgfr2*-signaling



476 promotes the progression of secretory cell differentiation. Third, mutant S2-cells in  
477 intermediate positions along the airway network activate the S1, innate immunity-related gene  
478 program. This shorter-range effect may be mediated by additional, relaying signalling  
479 mechanisms involving *Vegfa* and Wnt-signaling (Fig. 7C, Suppl. Fig. 1).

480 A potential model on how *Fgfr2*-signaling may control detoxification in secretory cells derives  
481 from the severe downregulation of *Myc*, *Atf4* and upregulation of *Cebpb*. In previous studies,  
482 *Myc* induces *Atf4* expression in cancer cells and they co-operatively regulate promoters of  
483 various target genes, including *Cebpb*<sup>87</sup>. In return, *Cebpb* directly binds to the *Myc* promoter  
484 and inhibits its expression<sup>88</sup>. The reduced expression of both *Atf4* and *Ets1* in S2 mutant cells  
485 may be linked to lower *Slc7a11* expression, affecting the detoxification ability of the cells by  
486 compromising their ability to exchange intracellular glutamate with extracellular cystine for  
487 glutathione synthesis<sup>89</sup>. In our data, both *Slc7a11* and *Gclc* were reduced in mutant cells. *Gclc*  
488 is a rate-limiting enzyme of the first step of glutathione biosynthesis<sup>90</sup>. Reduced glutathione  
489 levels might, in turn, indirectly up-regulate other detoxification- and oxidative stress-related  
490 genes, like *Sod1*, *Aldha1*, *Gsta3* and *Gstm1*, in a presumed compensatory mechanism to  
491 spare the mutant cells from reactive oxygen species and lipid peroxidation (Fig. 7D, Suppl.  
492 Fig. 1).

493 Some developmental gene expression changes in the airways of *Fgfr2* mutants show striking  
494 similarities with prior descriptions of cellular pathologies such as mucus hyperplasia rising  
495 during lung inflammation<sup>33</sup> and small airway proximalization in smokers and COPD patients<sup>91</sup>,  
496 <sup>92</sup>. Our systematic description of the spatial organization of airway gene expression programs,  
497 their timely establishment and their regulation by Fgf-signalling along the mouse airways may  
498 help further molecular understanding of lung inflammation and COPD pathogenesis and  
499 define new avenues for treatments.

500

## 501 **Materials and Methods**

### 502 **Animal models and Tamoxifen administration**

503 All mouse experiments were performed according to Swedish animal welfare legislation and  
504 German federal ethical guidelines. The Northern Stockholm Animal Ethics Committee  
505 approved the project (Ethical Permit numbers N254/2014 and 15196-2018). The Research  
506 Animal Ethics Committee in Gothenburg approved the analyses of germ-free (GF) mice  
507 (Ethical Permit number 4805-23). The GF mice were maintained in flexible film isolators (Class  
508 Biologically Clean, Madison, WI, USA). GF status was monitored regularly by aerobic and  
509 anaerobic culturing and PCR for bacterial 16S rRNA. All mice were group housed in a

510 controlled environment (room temperature of  $22 \pm 2$  °C, 12h daylight cycle, lights off at 7 pm),  
511 with free access to autoclaved chow diet (#T.2019S; Envigo) and water. Breedings and  
512 experiments performed in JLU, Giessen, Germany were under the Ethical Permit with number  
513 Gl 20/10, Nr. G 21/2017. For the lineage-tracing experiments, we used Scgb1a1-CreER<sup>T2</sup>  
514 <sup>pos/neg</sup>;Rosa26-fGFP<sup>pos/neg</sup> <sup>19</sup> mice. Noon of the day of the vaginal plug was considered as  
515 embryonic day (E) 0.5. We induced recombination by one oral dose (gavage) of Tamoxifen  
516 solution in corn oil (30mg/kg body weight) on E16.5, as described previously<sup>19</sup>. For the  
517 analysis of adult-lung epithelial heterogeneity and organoid cultures, we used Scgb1a1-  
518 CreER<sup>het</sup>;Rosa26-Ai14<sup>het</sup>;Sftpc-fGFP<sup>het</sup> adult mice<sup>29, 30</sup> and administered one Tamoxifen dose  
519 (100mg/kg body weight), 72 hours prior tissue collection. Experiments for Fgfr2-inactivation  
520 were performed using Scgb1a1-CreER<sup>T2</sup> <sup>pos/neg</sup>;RosaAi14<sup>pos/pos</sup>;Fgfr2b<sup>fl/fl</sup> and Scgb1a1-  
521 CreER<sup>T2</sup> <sup>neg/neg</sup>;RosaAi14<sup>pos/pos</sup>;Fgfr2b<sup>fl/fl</sup> mice. Tamoxifen was injected subcutaneously (87 mg/  
522 kg body weight) on P1, P2 and P3 to induce efficient recombination.

523

#### 524 **Tissue collection**

525 Animals were euthanized by an intraperitoneal injection of anesthesia overdose, followed by  
526 incision of the abdominal vein. For embryonic lungs, we did not perform heart perfusion. For  
527 postnatal lungs, the chest was opened and the left atrium was excised. Lungs were perfused  
528 through the right ventricle of the heart with ice-cold PBS 1X pH7.4, using a 26G needle and  
529 5ml syringe until they became white. Lungs were inflated with a mixture of 4% PFA:OCT (2:1  
530 v/v) using a 20G catheter (Braun, 4251130-01), until the accessory lobe was expanded. The  
531 trachea was ligated (with silk 5/0 Vömel thread, 14739) and tissues were later fixed. For  
532 histological analysis, tissues were collected on E19.5, on post-natal day 2 (P2), 5 (P5), 7 (P7),  
533 21 (P21) and 60 (P60). Embryonic and P2 tissues were fixed with freshly prepared 4%  
534 Paraformaldehyde (Merck, 104005) solution in PBS 1X pH7.4 (Ambion, AM9625) for 4 hours.  
535 Later stages were fixed for 8hours. Thereafter, the tissues were placed in OCT: 30% sucrose  
536 in PBS (2:1 v/v) over-night (O/N) at 4°C with gentle shaking and frozen in OCT (Leica  
537 Surgipath, FSC22), using plastic molds (Leica Surgipath, 3803025), by placing them in  
538 isopentane and dry ice. Tissue-OCT blocks were kept at -80°C until sectioning.

539

#### 540 **Tissue dissociation and cell isolation**

541 For full-length (Smart-Seq2) library preparation<sup>65</sup>, the left lungs were used for enzymatic  
542 digestion and the right lungs were treated as described above for histological analysis. For  
543 cell culture and droplet-based scRNA-Seq, both lungs were processed for digestion. Briefly,  
544 we cut the lungs in small pieces using a razor blade and digested them with elastase

545 (Worthington, LS002292) and DNase-I 0.5mg/ml (Sigma-Aldrich, DN25) in HBSS (Gibco,  
546 14175), at 37°C for 1 hour with rotation. An equal volume of HBSS++ [HBSS (Gibco, 14175),  
547 supplemented with 2% 0.2µm filtered FCS (Gibco, 10500), 0.1M HEPES (Sigma-Aldrich,  
548 H0887), antibiotics (Gibco, 15240096) and EGTA 2mM was added and the suspension was  
549 mixed gently. Then, the cells were centrifuged at 800g for 10 minutes at 4°C. The supernatant  
550 was removed with a serological pipette and cells were resuspended in HBSS++. Viability was  
551 tested using trypan blue (Sigma-Aldrich, T8154) (1:1 dilution) and the presence of  
552 fluorescence-positive cells was evaluated using a fluorescence microscope. Before sorting,  
553 cells were passed through a 100µm BD Falcon (BD Biosciences, 340610) to remove cell  
554 aggregates.

555 For E16.5 lungs, after digestion, centrifugation and resuspension in HBSS++, cells were  
556 passed through a 100 µm filter (BD Biosciences, 340610) and counted. We resuspended them  
557 in HBSS++ to obtain 20x10<sup>6</sup> cells/ml. 100µl of cell suspension were stained with 0.5µl of anti-  
558 EpCam-PE antibody (Biolegend, 118205) and 0.5µl anti-CD45-APC antibody (Biolegend,  
559 103112). Replicates of the above reactions were set in separate tubes to prevent aggregate  
560 formation, which is typical when a large number of epithelial cells are centrifuged.

561 For cell-sorting, we used a BD FACSAria III cell-sorter with 100µm nozzle using single-cell  
562 sorting purity. Cells from all stages were isolated according to GFP and/or Tomato (for Rosa-  
563 Ai14 mice) expression. Non-transgenic and single-transgene (either Scgb1a1-CreER;Rosa-  
564 Ai14 or Sftpc-GFP) positive animals were used for instrument calibration. For cell culture  
565 experiments, cells were sorted in HBSS++ medium and for droplet-based sequencing, we  
566 omitted EGTA and HEPES, according to 10x Genomics instructions.

567

### 568 **scRNA-Seq of adult lung cells**

569 Droplet based scRNA-Seq was carried out with Chromium Next GEN Single Cell 3' Kit version  
570 3 (10x Genomics), at the Eukaryotic Single Cell Genomics Facility at SciLifeLab, Sweden. The  
571 samples were processed with cellranger-4.0.0 pipeline (10x Genomics). The reads were  
572 mapped to a custom mouse (GRCm38) reference genome that contained GFP and Ai14  
573 cassette (RFP and WPRE sequences) sequences. The reference genome was created with  
574 the 10x Genomics "cellranger mkref" and the mapping of the reads was done with the  
575 "cellranger count" function using default settings.

576

## 577 **scRNA-Seq analysis of adult lung cells**

578 For the analysis of the droplet based scRNA-Seq dataset, we initially applied filtering criteria  
579 to filter out low quality cells and contaminants (Sftpc-GFP<sup>pos</sup> library: GFP-UMIs>4, number of  
580 detected genes > 2500 and <5500 and percent of mitochondrial genes >0 and <7.5; Scgb1a1-  
581 CreER:Rosa-Ai14<sup>pos</sup> Pdpn<sup>neg</sup> library: RFP-UMIs>4, number of detected genes > 2500 and  
582 <5500 and percent of mitochondrial genes >0 and <7.5; Scgb1a1-CreER:Rosa-Ai14<sup>pos</sup> Sftpc-  
583 GFP<sup>pos</sup> library: RFP-UMIs>4 and GFP-UMIs>4, number of detected genes > 2500 and <5500  
584 and percent of mitochondrial genes >0 and <7.5; Scgb1a1-CreER:Rosa-Ai14<sup>pos</sup> Pdpn<sup>pos</sup>  
585 library: RFP-UMIs>4, number of detected genes >3000 and <5500 and percent of  
586 mitochondrial genes >0 and <5). Genes with less than 50 counts in all cells were removed and  
587 the counts were transformed using the SCTransform<sup>93</sup> function in Seurat<sup>94</sup>, with 4000 variable  
588 genes and regressing out the number of counts and detected genes and the percent of  
589 mitochondrial counts. The first 50 principal components were used for dimension reduction  
590 and clustering, setting the number of neighbours to 25 and the resolution to 0.2. MAST<sup>95</sup> was  
591 used to identify DEGs after library normalization to 10.000 and log<sub>2</sub>-transformation.

592 We used an equal number of cells/cluster for the trajectory analysis and ran diffusion maps  
593 with Destiny<sup>35</sup>, implemented with scMEGA<sup>96</sup>. We used the 16 first principal components and  
594 k=25. We used the three first diffusion-map components for the visualization and down-stream  
595 analyses. We calculated the principal curves (“getCurves” function), the pseudotime estimates  
596 (“slingPseudotime” function) and the lineage assignment weights (“slingCurveWeights”  
597 function) with Slingshot<sup>97</sup>. We identified differentially expressed genes with the “fitGAM”  
598 function of tradeSeq<sup>98</sup>. For multiple trajectories, we used the “patternTest” and for one the  
599 “associationTest” functions. The genes were ordered based on the hierarchical clustering  
600 ward.D2 method, using “hclust” function in fastcluster package<sup>99</sup> and plotted using a custom  
601 script. The “clusterboot” function of fpc package<sup>100</sup> was used to calculate the stability values  
602 of gene-modules. GO-analyses were done at <http://geneontology.org/> selecting as organism  
603 the *Mus musculus* and using default settings. The Fisher's Exact test calculates the False  
604 Discovery Rate (FDR). Aggregated gene expression scores of genes in modules and  
605 biological processes were calculated with the “AddModuleScore” function in Seurat<sup>94</sup>. For  
606 Balloon-plots and heatmaps, we used the “DotPlot” and “DoHeatmap” functions in Seurat, in  
607 addition to the pheatmap-package<sup>101</sup>.

608

## 609 **Full length scRNA-Seq**

610 Single-cell library preparation was done according to Smart-Seq2 protocol<sup>65, 102</sup> with some  
611 modifications. Cells were sorted in 96-well plates (Piko PCR Plates 24-well, Thermo Scientific,

612 SPL0240 and Plate Frame for 24-well PikoPCR Plates, Thermo Scientific, SFR0241). Each  
613 well contained Triton-X100 (0.2%) (Sigma-Aldrich, T9284-100ML), ERCC RNA Spike-In Mix  
614 (1:400.000) (Life-Technologies, 4456740), Oligo-dT30 VN (1.25 $\mu$ M)  
615 AAGCAGTGGTATCAACGCAGAGTAC(30 x T)VN, dNTPs (2.5mM/each) (Thermo Scientific-  
616 Fermentas, R0192) and Rnase Inhibitor (1U/ $\mu$ l) (Clontech, 2313A) in 4 $\mu$ l final volume. After  
617 sorting, strips were covered with Axygen PCR-tube caps (VWR, PCR-02-FCP-C), centrifuged  
618 and placed on dry ice until storage at -80°C for further use. For cell culture, cells were sorted  
619 into HBSS++ buffer and kept on ice until they were processed for culture. To optimize Smart-  
620 Seq2<sup>65</sup> for mouse primary lung cells that are small and contain a small amount of RNA, we  
621 used 50% less Oligo-dT30 VN and the cDNA synthesis was divided into two steps, the first  
622 was without TSO LNA and the second contained 1 $\mu$ M TSO LNA and additional 40U of  
623 SuperScript II RT (Thermo-Fisher Scientific, 18064071). The reaction lasted 30 minutes at  
624 42°C. Then, the enzyme was deactivated at 70°C for 15 minutes. For Pre-Amplification PCR,  
625 we used the KAPA HiFi Hotstart ReadyMix (2x) (KAPA Biosystems, KK2602) and the ISPCR-  
626 primer AAGCAGTGGTATCAACGCAGAGT. PCR included 21 cycles and the total volume  
627 increased to 50 $\mu$ l in order to reduce the concentration of the unused Oligo-dT30 VN and TSO-  
628 LNA primers.

629 Tagmentation and indexed library amplification were done with Nextera® XT DNA Library  
630 Preparation Kit (Illumina, FC-131-1096) and Nextera® XT Index Kit (96 indexes, 384 samples)  
631 (Illumina, FC-131-1002) according to the manufacturer protocol (with 2.5 x volume reduction  
632 in all reactions). For tagmentation, we used 50pg of the libraries, as it was indicated by the  
633 500-9000bp fraction of the library (Bioanalyzer).

634 Sequencing was done with Illumina 2500 HiSeq Rapid mode using paired-end (2x125bp) and  
635 single-end (1x50bp) reading. For downstream analyses, we used one strand of paired-end  
636 libraries and trimmed the reads to 50bp.

637

### 638 **Single-cell RNA Sequencing bioinformatics analysis of Smart-seq2 dataset**

639 We initially kept the libraries with >40% uniquely mapped reads to a reference genome that  
640 contained GFP and ERCC sequences and removed *Esr1*, as an artifact because of sequence  
641 similarities with *Scgb1a1-CreER<sup>T2</sup>* transgene and *Xist*. Individual sequencing datasets were  
642 filtered regarding the number of detected genes (lower threshold: 2000 genes and upper  
643 threshold 10000 (P2272, P2661) and 6000 (P3504, P7657)). Then, we filtered out the libraries  
644 with more than 200 counts of *Pecam1* as not epithelial contaminants. Finally, we removed  
645 libraries with more than 7.5% of mitochondrial gene counts, resulting in 354 libraries for  
646 downstream analysis.



647 We used SCT-transformation in Seurat with 3000 variable genes and regressed out the  
648 number of counts and detected genes and the percent of mitochondrial counts. The 20 first  
649 principal components were used for dimension reduction, setting the number of neighbours to  
650 12 and resolution to 1. Diffusion maps were produced as in the adult dataset using the first 12  
651 principal components and  $k=12$ . For the identification of DEGs, we used the MAST analysis  
652 in Seurat. For the trajectory analyses, we used Slingshot, setting as root the cluster-0  
653 (embryonic) and end-point clusters the -2 (S1), -1 (S2), -4 (ciliated) and -3 (DP). The diffusion-  
654 map 3D-plots were created with scatter3D function of scatterplot3d<sup>103</sup>. GO-analyses and  
655 aggregated scores were produced as in the adult dataset.

656

### 657 **scRNA-Seq of *Fgfr2*-inactivated airway epithelial cells**

658 We followed the procedure for tissue dissociation and cell isolation as in the other FACs-  
659 sorting experiments. Single-cell suspensions from three P7 *Scgb1a1-CreER<sup>T2</sup> neg/neg*; *Rosa26-*  
660 *Ai14<sup>pos/pos</sup>*; *Fgfr2<sup>fl/fl</sup>* mice were pooled and used as negative control samples. Three P7 and  
661 *Scgb1a1-CreER<sup>T2</sup> pos/neg*; *Rosa26-Ai14<sup>pos/pos</sup>*; *Fgfr2<sup>fl/fl</sup>* mice were combined and used as  
662 experimental groups. The same approach was used for two P21 negative control lungs and  
663 three experimental. Cells were counted with a Biorad cell counter, blocked with TruStain  
664 FcX™ PLUS (Biolegend, 156604), stained with a PE/Cyanine7 anti-mouse CD326 antibody,  
665 and washed according to the manufacturer's protocol (Biolegend, 118216). The negative  
666 control samples were sorted based on Epcam positivity and from the experimental groups, we  
667 isolated *Epcam<sup>pos</sup>-Ai14<sup>neg</sup>* and *Epcam<sup>pos</sup>-Ai14<sup>pos</sup>* cells. The isolated cells were processed with  
668 the Chromium Next GEM Single Cell 3' Reagent Kits v3.1 (10xGenomics), following the  
669 manufacturer's instructions and targeting 7000 cells/well. The produced libraries were  
670 sequenced with a NovaSeq 6000 in two runs, one for each time point.

671

### 672 **scRNA-Seq analysis of the *Fgfr2*-inactivated epithelial cells**

673 We initially processed all cells and filtered out genes that were expressed in fewer than 5 cells  
674 and followed the same analysis approach as in the lineage-tracing dataset, using 4000  
675 variable genes. We removed *Krt13<sup>high</sup>* oesophageal/tracheal basal cells, *Ptprc<sup>pos</sup>* immune and  
676 *Col1a2<sup>pos</sup>* mesenchymal cells as contaminants. Filtered cells were re-clustered after filtering  
677 out genes that are expressed in less than 20 cells and selecting the 5000 most variable genes.  
678 We used the 20 first principal components,  $k=15$  and resolution=0.2. Then, we selected the  
679 airway secretory clusters for downstream analyses as described for the other datasets, using  
680 600 variable genes, 15 principal components, resolution = 0.99 and  $k=8$ .



681

## 682 **scRNA-Seq analysis of the GSE149563**

683 For the analysis of the publicly available GSE149563 scRNA-Seq dataset, we analysed each  
684 timepoint individually with Seurat, using 4000 variable genes and 50 top principal components.  
685 We used DoubletFinder<sup>104</sup> package in R to identify and remove multiplets. The postnatal  
686 datasets were integrated and processed for clustering and differential expression analysis as  
687 in the other datasets. The epithelial clusters were further filtered to remove possible  
688 endothelial (Pecam1<sup>pos</sup>) and mesenchymal (Col1a2<sup>pos</sup>) cells and re-clustered selecting the  
689 4000 most variable genes. We used the 50 first principal components, k=25 and  
690 resolution=0.6.

691

## 692 **Organoid cultures**

693 Lung digestion and cell sorting were performed as above, including the Dead cell stain  
694 (NucRed, Thermo) to sort out dead cells. Sorted epithelial cells (100-600 cells/well) were  
695 mixed with the Mlg2908 (ATCC, CCL-206) mouse lung fibroblasts (10<sup>4</sup> cells/well), as  
696 described before<sup>105</sup>. Colonies were then fixed in 4% PFA O/N and placed in 30% sucrose  
697 solution for 24hours. Freeze-thawing and gentle pipetting were performed twice to remove  
698 Matrigel. Colonies were then incubated with 30% sucrose and 30% OCT overnight and  
699 embedded in OCT. Blocks were cut at 12-14µm for immunofluorescence.

700

## 701 **Immunofluorescence**

702 The tissues were sectioned with a cryostat (Leica CM3050S). 10µm thick sections were placed  
703 on poly-lysine slides (Thermo Scientific, J2800AMNZ), kept at room temperature (RT) for  
704 3hours with silica gel (Merck, 101969) to completely dry and then stored at -80°C until use. All  
705 antibodies are described in Supplementary Table 9. All secondary antibodies were used at a  
706 dilution of 1:300-1:400.

707 For antigen retrieval (when necessary, see Supplementary Table 9), slides were placed in  
708 plastic jars with the appropriate solution and warmed at 80°C for 30min in a water bath. Then,  
709 the jars were placed in ice for 30min to cool. Blocking was done with 5% donkey serum  
710 (Jackson Immuno-research, 017-000-121) for 1hour at RT and the primary antibodies were  
711 incubated at 4°C O/N. After washes, the secondary antibodies were applied on the sections  
712 at RT for 1hour in the dark. The nuclei were counterstained with a DAPI solution 0.5µg/µl  
713 (Biolegend, 422801) in PBS 1X Triton-X100 0.1% and for mounting we used the ProLong Gold  
714 Antifade Reagent (Thermo-Fischer Scientific, P36934).

715 In the staining for cells that escaped inactivation of Fgfr2, we used extended antigen retrieval  
716 incubation (90 minutes) and employed a Biotin-Streptavidin staining strategy to improve the  
717 FGFR2 signal. In short, we used the Avidin/Biotin Blocking Kit (SP-2001, Vector Laboratories)  
718 after blocking and before primary antibody incubation, according to the manufacturer's  
719 suggestions (15min Avidin, Rinse, 15min Biotin, Rinse). After O/N incubation with primary  
720 antibodies and washes, we incubated the sections with a Biotin-SP-conjugated donkey anti-  
721 rabbit IgG (Secondary antibody) for 1hr at RT. After three washes, the sections were incubated  
722 with an Alexa Fluor® 647-conjugated Stretavidin for another 1hr at RT.

723 Images were acquired with Zeiss LSM780, LSM800 confocal microscopes (Carl Zeiss  
724 Microscopy GmbH, Jena, Germany) and Zeiss Axio Observer Z.2 fluorescent microscope with  
725 Colibri2 or Colibri7. Image analysis was done using Fiji<sup>106</sup> and Zeiss Zen Blue 2.5.

726

### 727 **Quantification of S1 and S2 markers along the PD-axis**

728 To quantify S1 or S2 marker co-expression, we acquired five confocal microscopy images  
729 from P, I1-3 and D domains, from one P60 mouse lung section. Cell counting was performed  
730 using a custom pipeline at Cell Profiler 3.1. “Global” threshold strategy, “otsu” threshold  
731 method and three classes of thresholding were used. False positive and negative cells were  
732 manually curated.

733

### 734 **Quantification of S1 and S2 markers in SPF and GF mice**

735 For the quantification of mean fluorescence intensity of S1 or S2 marker in proximal and distal  
736 regions of the left lung lobe in germ-free (GF) (P62) and specific pathogen-free (SPF) mice  
737 (P60), z-stacks of the whole lobe were captured with a Zeiss Axio Observer Z.2 fluorescent  
738 microscope with Colibri2 or Colibri7, equipped with a Zeiss AxioCam 506 Mono digital camera  
739 and an automated stage. Z-Stacks were projected using the “Orthogonal Projection” using the  
740 “Maximum” method and stitched using the “Stitching function” (Zen Blue). ROIs were drawn  
741 manually in proximal and TB regions using E-Cadherin and DAPI channels as a reference,  
742 and mean fluorescence intensity was measured using the Zen Blue software. Mean  
743 Fluorescence intensity (MFI) for the individual markers was normalized against the MFI of E-  
744 Cadherin for each ROI and the results from 3 animals per condition (SPF or GF) were  
745 combined into one dataset. Statistical analysis for differences between proximal and distal  
746 was done using a two-way unpaired T-test in GraphPad Prism.

747

## 748 **SCRINSHOT spatial analyses**

749 For spatial analysis of the identified cell types, we applied SCRINSHOT<sup>57</sup>. The utilized padlock  
750 and detection probes are summarized in Supplementary Table 17. Images were captured with  
751 a Zeiss Axio Observer Z.2 fluorescent microscope with Colibri2 or Colibri7, equipped with a  
752 Zeiss AxioCam 506 Mono digital camera and an automated stage.

753 We used DAPI to align the images of the same areas between the hybridizations. We created  
754 multi-channel \*.czi files with the signal of each detected gene as a unique channel and  
755 exported them as images (16-bit \*.tiff format) using Zen Blue 2.5 (Carl Zeiss Microscopy,  
756 GmbH). Images were tiled with Matlab with Image Analysis toolbox (The MathWorks, Inc.).  
757 Manual nuclear segmentation was done with Fiji ROI Manager<sup>106</sup> and signal-dot counting was  
758 performed with Cell-Profiler 3.15<sup>107</sup>. Annotation of signal dots to the cells (2 $\mu$ m expanded  
759 nuclei) was done with Fiji.

760

## 761 **S1 and S2 cell spatial analyses**

762 For the spatial analysis of S1- and S2-cells, we targeted the module-5 secreted proteins  
763 *Scgb3a1*, *Reg3g*, *Bpifb1*, *Tff2* and *Muc5b*, the receptor *Lgr6* that has previously been reported  
764 to be expressed by distinct epithelial and mesenchymal lung cell-types<sup>108</sup> and the goblet-cell  
765 transcription factor *Pax9*, which are enriched in S1-cells. For the distal lung compartment (DP,  
766 S2 and alveolar cells), we used the module-2 markers *Hp* and *Scgb1a1* in addition to the  
767 module-3 surfactant proteins *Sftpc* and *Sftpb*, the enzyme *Atp8a1*, the IGF-signaling regulator  
768 *Igfbp6* and the advanced glycosylation end products receptor *Ager*. We also targeted the  
769 ciliated-cell markers *Foxj1* and *Tuba1a* to recognize ciliated cells.

770 P, I1, I2, I3 and D domains from sections of three P60 mouse lungs were analysed for the  
771 selected panel of markers. Nuclei were manually segmented in the acquired images based on  
772 DAPI and manually curated based on E-cadherin antibody staining, resulting to 6915 nuclei.  
773 Nuclear ROIs for each animal were expanded and filtered, keeping those with size between  
774 Mean cell-ROI size  $\pm$  2 standard deviations. Cell-ROIs with dots for only 1 analysed marker  
775 were removed. We further filtered the Cell-ROIs, keeping those with a total number of dots  
776 between the Mean number of dots  $\pm$  2 standard deviations. Cell-ROIs from all images were  
777 merged and log<sub>2</sub>-transformed [ $\log_2(\text{dots} + 1)$ ]. After principal component analysis (PCA), the  
778 top up- or down-regulated genes of the first two principal components were used to cluster the  
779 Cell-ROIs with clusterboot, using the ward.D2 method. The heatmap of the analysed cells was  
780 done with pheatmap-package in R. The balloon-plots of the expression levels (color intensity)  
781 and the percent of positive cells (size) were produced with ggpubr-package in R.

782

### 783 **DP cell spatial analysis**

784 For the selection of the gene-panel for the spatial analysis of DP-cells, we used differential  
785 expression analyses to compare them with S2-cells and AEC2a. The panel included *Scgb1a1*  
786 and *Sftpc* (the positivity of both defines the DP-cells/BASCs<sup>22, 24, 25</sup>) and the cytochrome genes  
787 *Cyp2f2* and *Cyp4b1* that showed high expression in S1- and S2-cells, moderate in DP and  
788 low in AEC2 cells. Based on the average fold change and the percentage of positive cells, we  
789 additionally selected the secreted proteins *Lyz2* and *Lgi3*, the extracellular matrix proteins  
790 *Egfl6*, *Npnt* and *Col4a2*, the enzyme *Napsa*, the surface molecules *Cd74* and *Cldn18*, the  
791 transcription factors *Etv5* and *Rbpjl* and the negative regulator of Wnt-signalling *Nkd1*. We  
792 also included *Ager* as a distal epithelial marker and the NE-cell markers, *Ascl1* and *Calca*  
793 (*Cgrp*). In two independent experiments, we analysed several lung areas from three adult  
794 (P60) mice and manually segmented 58072 nuclei. Cell-ROIs with a size outside 2 standard  
795 deviations from the average size of all Cell-ROIs from each lung were excluded from the  
796 analysis. The selection of ROIs extracted DP-cells with more than 24 dots of *Scgb1a1* and  
797 *Sftpc* that have also *Scgb1a1*-dots  $\geq 10$  and *Sftpc*-dots  $\geq 10$ . The balloon-plots of the  
798 expression levels (colour intensity) and the percent of positive Cell-ROIs (size) were produced  
799 with *ggpubr*-package<sup>109</sup> in R.

800

### 801 **Statistical analyses**

802 Statistical analysis of the results was done with a two-way multiple comparisons test in  
803 GraphPad Prism (GraphPad Software, Inc.) or by MAST in Seurat. In GraphPad Prism,  
804 multiple comparisons were performed using Tukey statistical hypothesis testing. Adjusted p-  
805 values in MAST were calculated based on Bonferroni correction.

806

### 807 **Data Availability**

808 scRNA-Seq data are available in GEO (lineage-tracing dataset of *Scgb1a1*-CreER<sup>T2</sup>  
809 <sup>pos/neg</sup>;*Rosa26*-fGFP<sup>pos/neg</sup> cells: GSE215957, adult dataset of *Scgb1a1*-CreER<sup>T2</sup> <sup>pos/neg</sup>;*Rosa26*-  
810 *Ai14*<sup>pos/neg</sup> cells: GSE216210 and *Fgfr2*-inactivation dataset of *Scgb1a1*-CreER<sup>T2</sup>  
811 <sup>pos/neg</sup>;*Rosa26*-*Ai14*<sup>pos/pos</sup>; *Fgfr2*<sup>fl/fl</sup> cells: GSE216451). Scripts and RAW-image data can be  
812 found in Zenodo (doi: 10.5281/zenodo.10418253).

813

814 **Acknowledgements**

815 We thank the SciLifeLab NGI and WABI for long-term bioinformatics support. We acknowledge  
816 resources provided by the Swedish National Infrastructure for Computing (SNIC) at UPPMAX,  
817 partially funded by the Swedish Research Council through grant agreement no. 2018-05973  
818 (projects b2015134 and SNIC 2021/22-431). The work was supported by grants from VR  
819 2019-04893, CF 211794 Pjo1H and the Erling Persson Foundation 2023-0035 to CS. We  
820 acknowledge the European Respiratory Society-EMBO for the European Respiratory Society  
821 Long-Term Research Fellowship to AS (Reference Number: LTRF 2014 – 3565).

822

823

824

825

826

827

828

829

830

831

832

833

834

835

836

837

838

839

840

841

842 **Figures**

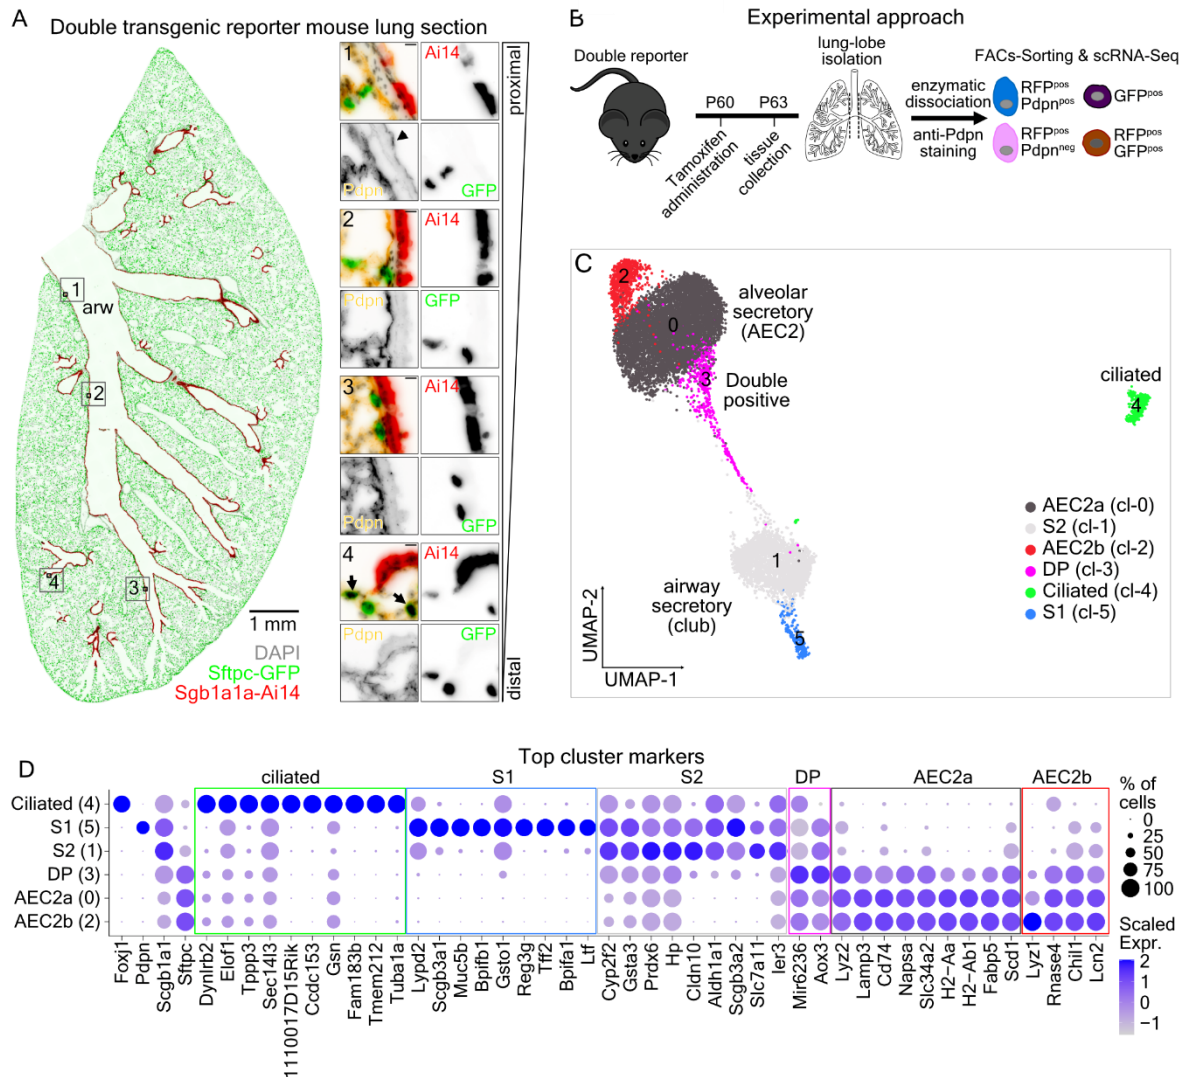

**Figure 1. Characterization of lung secretory cell heterogeneity. (A)** Colour-inverted fluorescence image of a left-lung section from an *Scgb1a1-CreER<sup>T2</sup> pos/neg; Rosa26-Ai14<sup>pos/neg</sup>; Sftpc-GFP P63* reporter mouse, three days after Tamoxifen administration. DAPI (nuclei): grey, RFP (Ai14): red, GFP (Sftpc): green, Pdpn: yellow. Scale-bar: 1mm. Inserts correspond to the numbered ROIs. Insert Scale-bars: 20 $\mu$ m **(B)** Experimental outline for the isolation and single-cell RNA sequencing (scRNA-Seq) of the labelled cells from the reporter mouse. **(C)** UMAP-plot of 12030 cells, grouped into six clusters. Cluster (cl) 0: AEC2a (alveolar epithelial cell type-2a) (dark grey), cl-2: AEC2b (red), cl-5: airway secretory cell type-1 (S1) (blue), cl-1: airway secretory cell type-2 (S2) (light grey), cl-3: *Scgb1a1<sup>pos</sup> Sftpc<sup>pos</sup>* double positive (DP) (magenta) and cl-4: ciliated cells (green). **(D)** Balloon-plot of known epithelial markers. Ciliated: *Foxj1*, Club cells: *Scgb1a1*, Proximal-airway secretory and AEC1: *Pdpn*, AEC2 and DP-cells: *Sftpc*, in addition to the expression of the top-10 differentially expressed genes of each cluster. The genes were filtered according to average log<sub>2</sub> Fold-change (>0.5), adjusted p-value (<0.001) and percent of positive cells (>0.25) and the top-10 markers according to average log<sub>2</sub> Fold-change were plotted. Gene order follows the cluster order. Balloon size: percent of positive cells. Colour intensity: scaled expression (blue: high and grey: low).



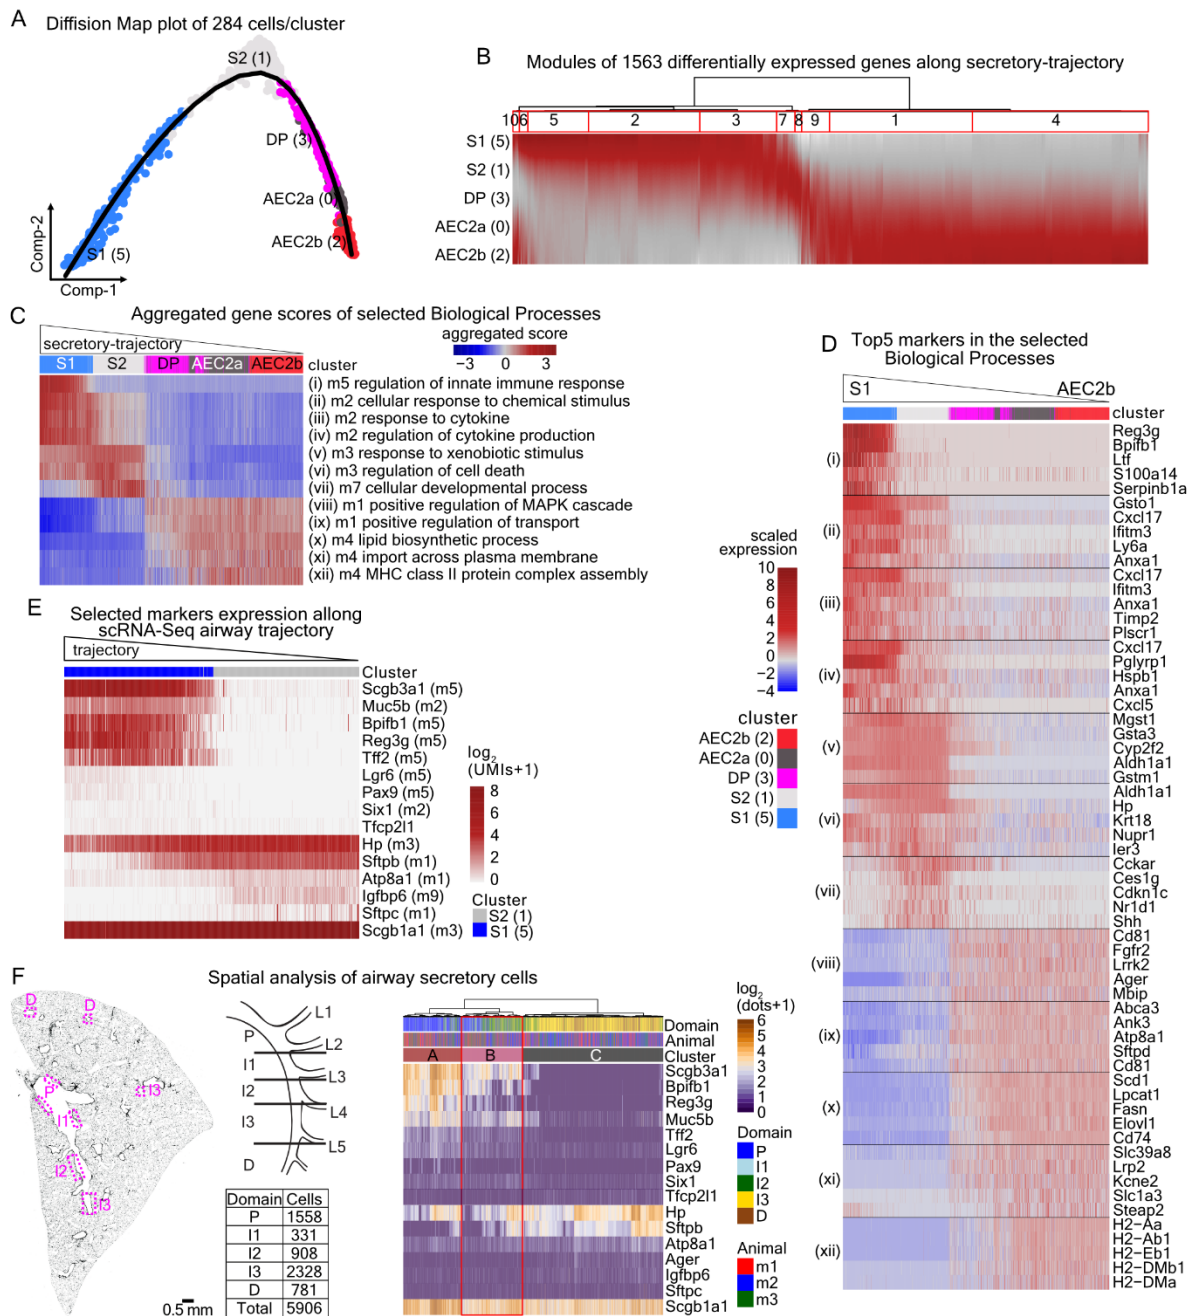

**Figure 2. scRNA-Seq trajectory recapitulates the airway proximal-distal patterning. (A)** Diffusion-map of secretory cell clusters. Colours and numbers as in Fig. 1C. Line: estimated pseudotime-trajectory by Slingshot. **(B)** Heatmap of the 1563 differentially expressed genes (FDR<0.001 and meanLogFC>1) along pseudotime, based on tradeSeq. The dendrogram of hierarchical clustering (left) indicates 10 stable gene-modules. Bootstrapping values: module-1: 0.65, module-2: 0.62, module-3: 0.61, module-4: 0.74, module-5: 0.68, module-6: 0.75, module-7: 0.8, module-8: 0.7, module-9: 0.64, module-10: 0.9. Colour intensity: scaled expression. Dark red: high, Gray: low. **(C)** Heatmap of the aggregated expression scores of the genes in the indicated biological processes (Suppl. Table3). The number after “m” indicates the module containing the genes in “B”. Cells were ordered according to pseudotime (Fig. 2A). red: high, blue: low. **(D)** Heatmap of the top-5 genes (according to “waldStat” score) of the indicated biological processes in “C”. Cells were ordered according to pseudotime. Colour: scaled expression (red: high, blue: low). **(E)** Heatmap of the selected

S1 (cluster-5) and S2 (cluster-1) scRNA-Seq markers, ordered along pseudotime. Expression levels:  $\log_2(\text{normalized UMI-counts}+1)$  (library size was normalized to 10.000). **(F) Left panel:** (left) Representative adult mouse lung section stained with DAPI (grey) showing examples of imaged areas along the PD-axis (3 lungs have been analysed with similar results). (Right-up) Cartoon of airway domain classification approach. (Right-bottom) Synopsis of analysed cell-ROIs from three animals, for indicated domains. **Right panel:** Heatmap of 3096 analysed airway secretory cell-ROIs, showing the  $\log_2(\text{SCRINSHOT dots} + 1)$  signal for the selected markers. Cell-ROI ordering is based on hierarchical clustering. Annotation bars show the (i) airway domains of the cell-ROIs, (ii) the analysed mouse and (iii) the indicated cluster. Cluster-A: P-domain cells  $38.61 \pm 6.89\%$ , I1-domain cells  $21.61 \pm 2.46\%$ . Cluster-B: I2-domain cells  $37.79 \pm 7.54\%$ . Cluster-C: I3-domain cells  $52.08 \pm 6.57\%$ , D-domain cells  $69.49 \pm 2.20\%$ .

844

845

846

847

848

849

850

851

852

853

854

855

856

857

858

859

860

861

862

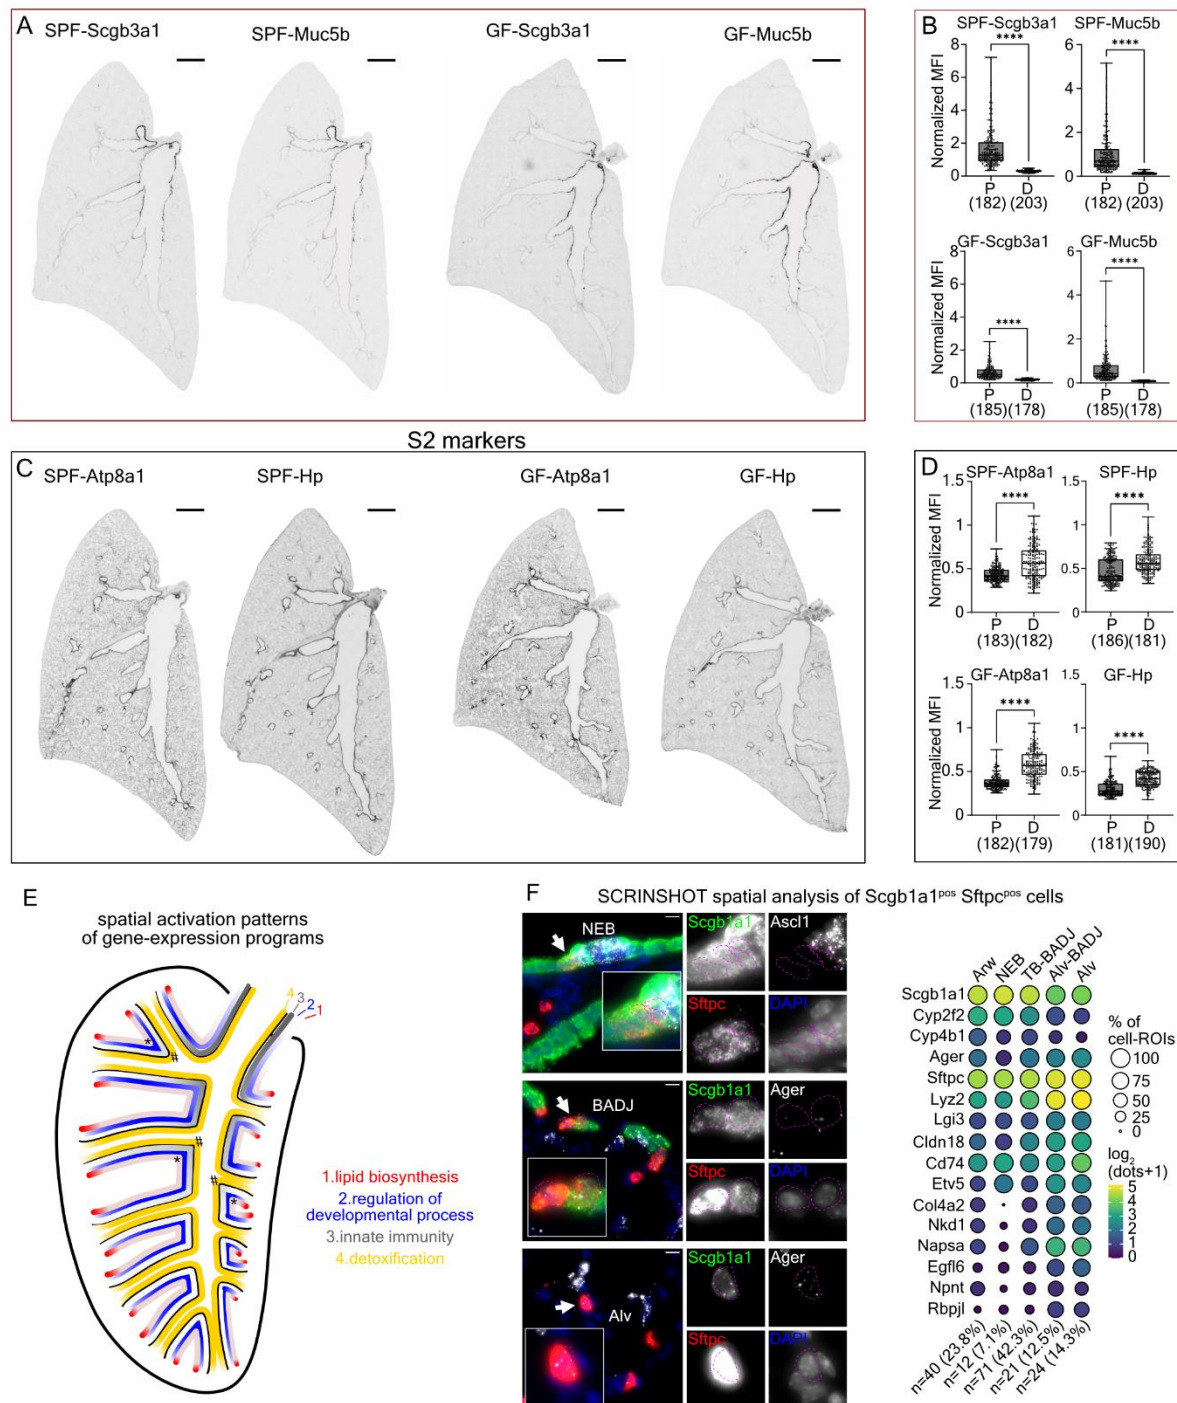

**Figure 3. Gene expression patterns along the airway PD-axis. (A)** Immunofluorescence stainings of whole lung sections of specific pathogen free (SPF) and germ-free (GF) 2 months-old mice for Scgb3a1 and Muc5b S1-markers. Scale-bars: 1000  $\mu$ m. **(B)** Quantification of immunofluorescence mean fluorescence intensity (MFI) of the indicated target, normalized to the E-Cadherin signal. Numbers in parentheses: number of analysed proximal and distal cell-ROIs. Statistics with Student's t-test: \*\*\*\*  $p < 0.0001$ . **(C-D)** As in "A-B" for the Hp and Atp8a1 markers that are highly expressed in distal airways. **(E)** Graphical representations of the activated gene expression programs (as in Fig. 2C) along the proximal-distal axis of the adult mouse lung airways. Colour intensity: activation level. Dark: high, Fade: low. Exceptions in the expression of the lipid metabolism (asterisk) and

detoxification (hash) programs relating to neuroepithelial body topology. **(F) Left:** SCRINSHOT analysis images for *Scgb1a1*<sup>pos</sup> *Sftpc*<sup>pos</sup> cells (arrows) close to neuroendocrine (NE) cells (upper panel), terminal bronchioles (TB) (middle panel) and alveoli (lower panel). Magenta dotted-lines: outlines of 2 $\mu$ m-expanded *Scgb1a1*<sup>pos</sup> *Sftpc*<sup>pos</sup> nuclei. Arrows: *Scgb1a1*<sup>pos</sup> *Sftpc*<sup>pos</sup> cells. *Sftpc*: red, *Scgb1a1*: green, *Ascl1*: grey and DAPI: blue. **Right:** Balloon plot of the 16 analysed genes (module-3: *Scgb1a1*, *Cyp2f2* and *Cyp4b1*, module-1: *Ager*, *Sftpc* and *Lyz2* and module-4: *Lgi3*, *Cldn18*, *Cd74*, *Etv5*, *Col4a2*, *Nkd1*, *Napsa*, *Egfl6*, *Npnt* and *Rbpjl*) in the 170 identified *Scgb1a1*<sup>pos</sup> *Sftpc*<sup>pos</sup> cells, according to their position. Balloon size: percentage of positive cells. The colour intensity:  $\log_2(\text{SCRINSHOT dots} + 1)$ . Yellow: high, Dark blue: low. “n”: number of cells in the specified position.

863

864

865

866

867

868

869

870

871

872

873

874

875

876

877

878

879

880

881

882



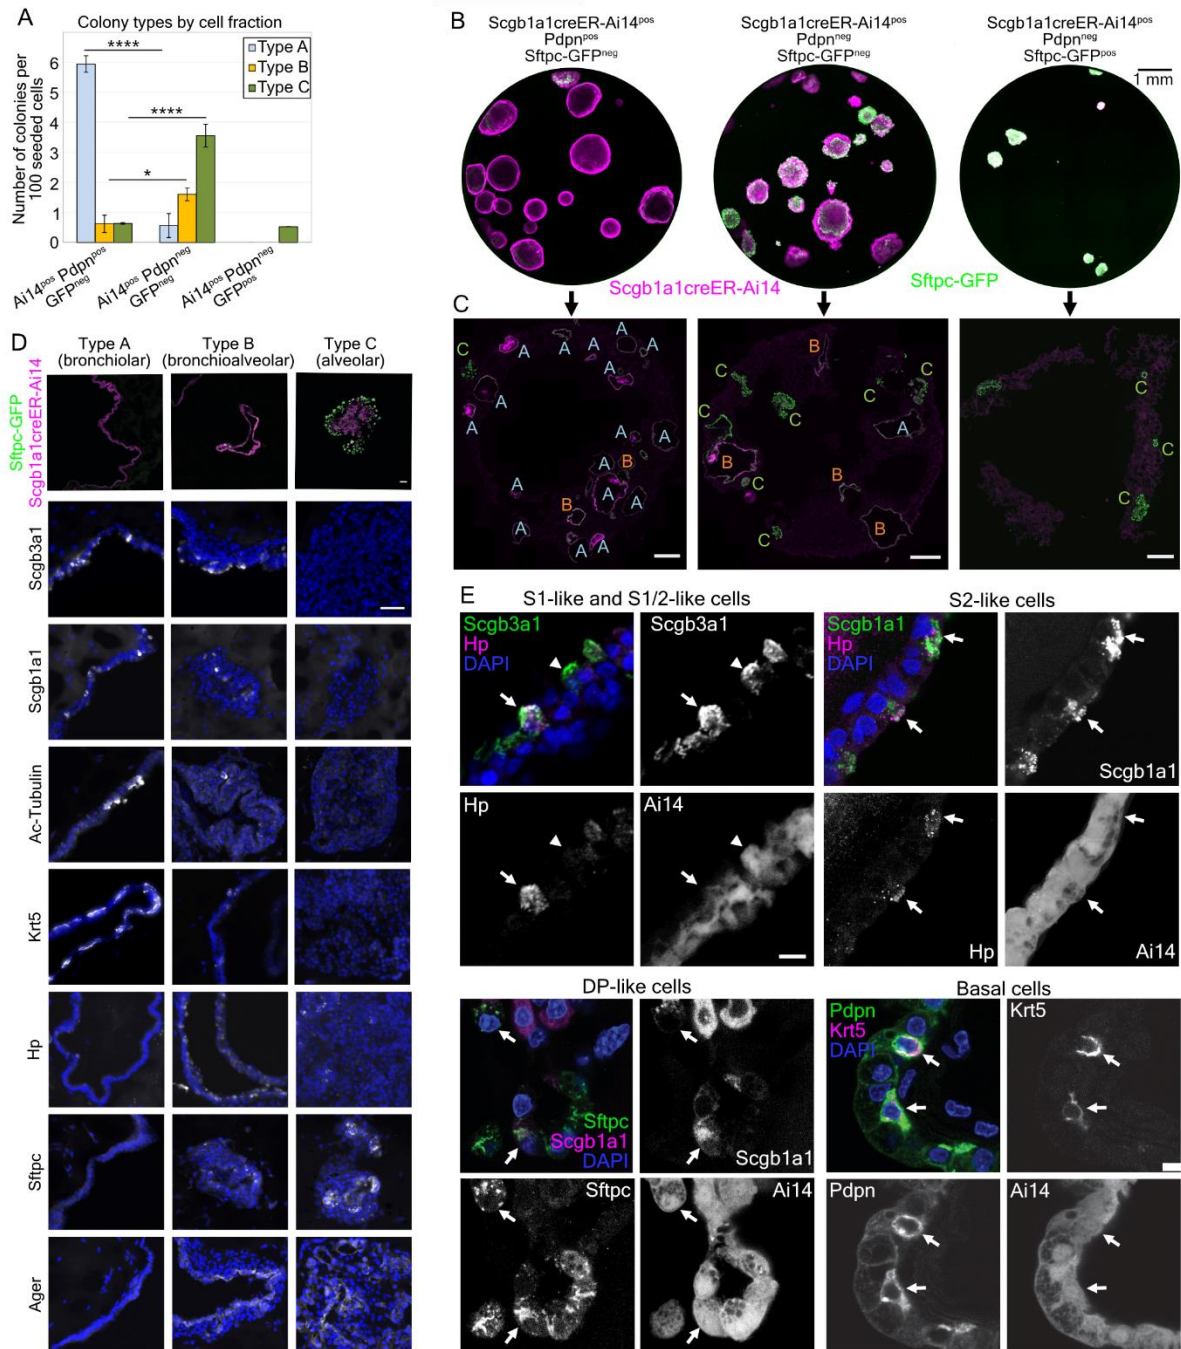

**Figure 4. Clonogenic and differentiation potential of airway secretory cell states. (A)** Bar plot of colony numbers per 100 seeded cells (counted 2-3 whole wells per cell type from four animals, three independent experiments) with embedded percentage of colony types derived from each type of seeded cells, (counted one well of each cell type from three animals, three independent experiments). Type-A: bronchiolar colony, Type-B: bronchioalveolar colony, Type-C: alveolar colony. Error bars correspond to standard error from the mean, \*  $p < 0.05$ , \*\*  $p < 0.01$ , \*\*\*  $p < 0.001$ . Number of colonies counted from 4 different mice, type-A: 52, type-B: 16, type-C: 44. Two tailed equal variance Student's t-test (after a variance comparison test for all datasets) was performed. **(B)** Representative whole-culture images from Scgb1a1creER-Ai14<sup>pos</sup> Pdpn<sup>pos</sup> Sftpc-GFP<sup>neg</sup>, Scgb1a1creER-Ai14<sup>pos</sup> Pdpn<sup>neg</sup> Sftpc-GFP<sup>neg</sup> and Scgb1a1creER-Ai14<sup>pos</sup> Sftpc-GFP<sup>pos</sup> seeded cells. Scale-bar: 1mm. **(C)** Images of 10µm thick sections of representative cultures showing Ai14 and GFP

transgene fluorescence. The letters indicate the colony annotations. **(D)** Representative images of the three types of colonies, showing the Ai14 and GFP transgene fluorescence and the immunofluorescence signal for bronchiolar (Scgb1a1), S1 (Scgb3a1), basal (Krt5), ciliated (acetylated Tubulin), and distal epithelial (Hp, Sftpc, Ager) markers. Nuclei-DAPI: blue. Scale bar: 50  $\mu$ m. **(E)** Confocal microscopy images for the detection of S1 (Scgb3a1<sup>pos</sup> Hp<sup>pos</sup>), intermediate (Scgb3a1<sup>pos</sup> Hp<sup>pos</sup>), S2 (Scgb1a1<sup>pos</sup> Hp<sup>pos</sup>) and DP (Scgb1a1<sup>pos</sup> Sftpc<sup>pos</sup>) cells in analysed colonies. Arrows indicate positive cells for both analysed markers. Scale-bar 10  $\mu$ m. Whole well culture section from each fraction of cells was stained and analysed from three biological replicates.

883

884

885

886

887

888

889

890

891

892

893

894

895

896

897

898

899

900

901

902

903

904

905

906

907

908

909

910

911



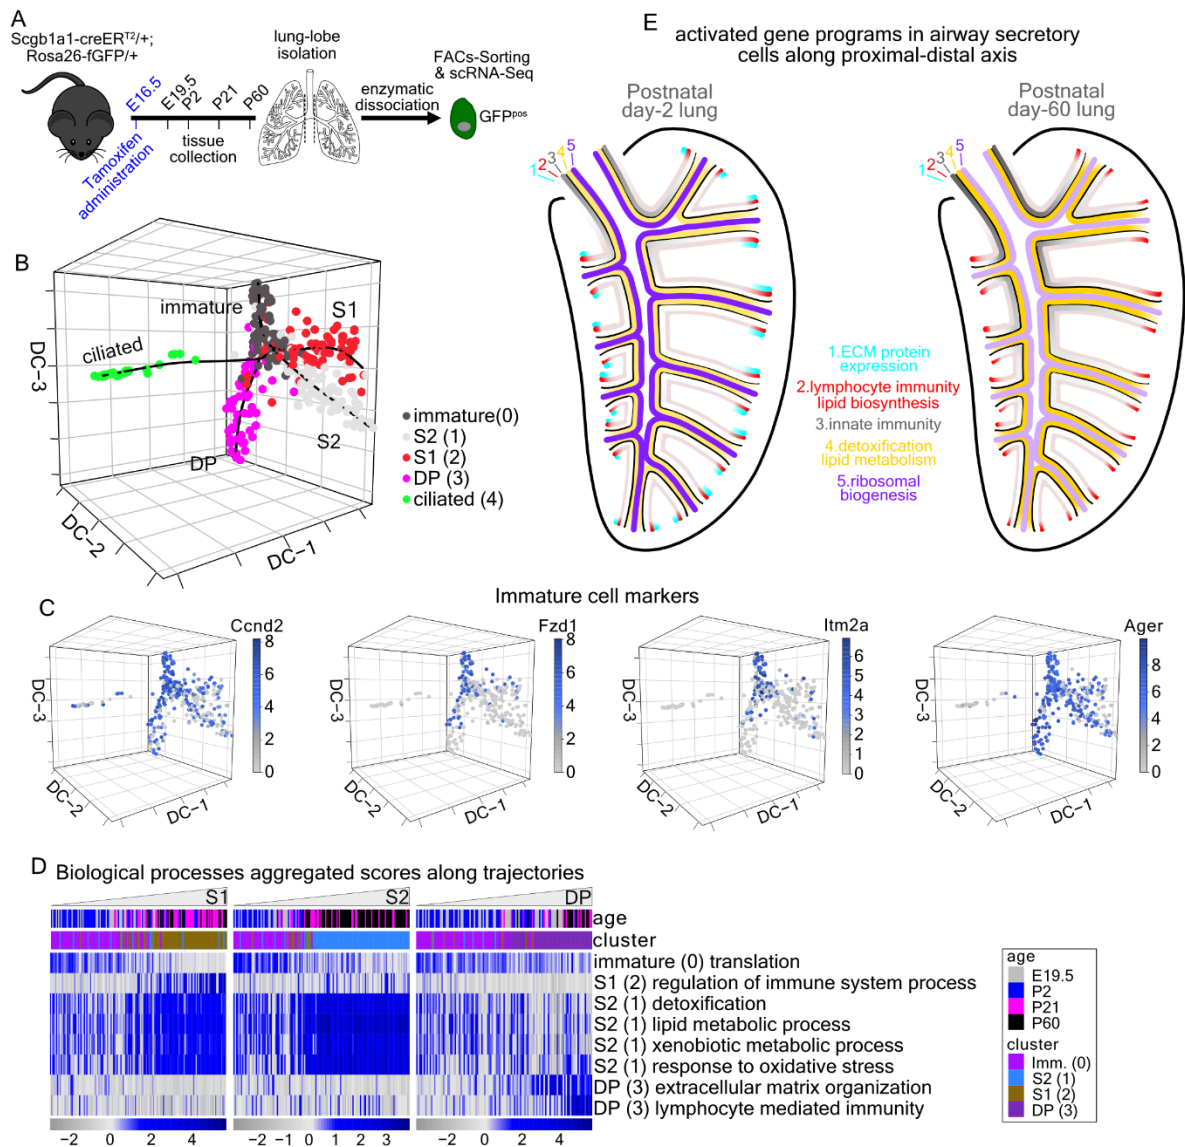

**Figure 5. Lineage-tracing of airway secretory cell heterogeneity. (A)** Experimental outline for the isolation and single-cell RNA sequencing (scRNA-Seq) of the labelled cells from the Scgb1a1-CreER<sup>T2</sup> pos/neg; Rosa26-fGFP<sup>pos/neg</sup> reporter mice. **(B)** 3D Diffusion-map plot of 354 full-length, single-cell cDNA libraries. Colours: suggested clusters. Lines: four distinct lineage-trajectories, calculated by Slingshot. **(C)** 3D Diffusion-map plots of the perinatally expressed genes *Ccnd2*, *Fzd1*, *Itm2a* and *Ager*. Expression levels: log<sub>2</sub>(normalized counts+1) (library size was normalized to 10<sup>6</sup>). Blue: high, Gray: zero. **(D)** Heatmaps of the aggregated gene expression scores of the indicated biological processes (see Suppl. Table 6). The cells were ordered according to the pseudotime values of the trajectories in “B”. Blue: high, Gray: low. **(E)** Synopsis of the gene expression programs activation in airway secretory epithelial cells, along the proximal-distal axis, in the postnatal day-2 (left) and -60 (right) lungs. Colour intensity: activation level. Dark: high, Fade: low. ECM: extracellular matrix.

912

913

914

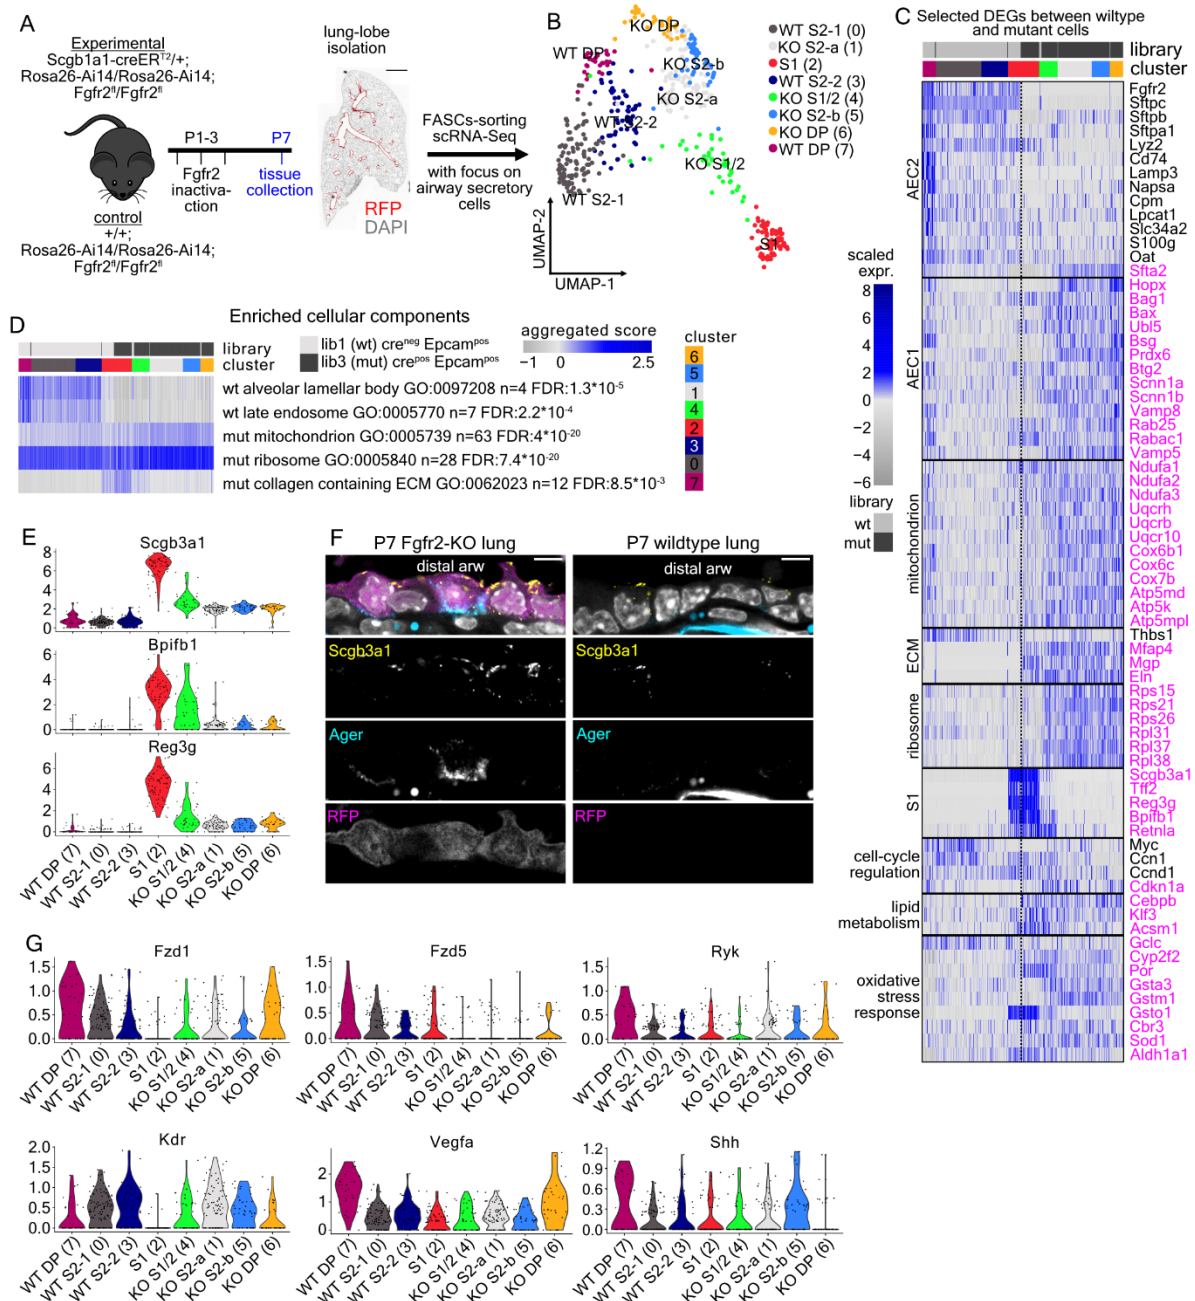

**Figure 6. *Fgfr2*-inactivation in airway secretory cells causes extended gene expression changes.** (A) Experimental outline for the perinatal inactivation of *Fgfr2* in *Scgb1a1*<sup>pos</sup> cells and analysis with single-cell RNA sequencing (scRNA-Seq) and histology. (B) UMAP-map plot of equal numbers of randomly-selected mutant and wildtype airway secretory cells of clusters -2 and -4 in Extended Data Fig. 4F. Colours: suggested clusters. (C) Heatmap showing the expression of selected, differentially expressed genes between the wildtype (library-1) and the mutant (library-3) airway secretory cells. Genes are organized in distinct categories according to previous knowledge and Gene Ontology analysis. Colour: scaled expression. blue: high, grey: low. (D) Heatmap of the aggregated scores of selected statistically significant, altered cellular components according to GO-analysis (see Suppl. Table 8). The results are based on the statistically-significant, differentially expressed genes between the wildtype (library-1) and the mutant (library-3) airway secretory cells. The cells are ordered according to the clusters (colours as in "B").

Score: blue: high, grey: low. “FDR”: false discovery rate, “n”: number of genes. **(E)** Violin plots of the *Scgb3a1*, *Bpifb1* and *Reg3g* showing their up-regulation in *Fgfr2*-mutant cells **(F)** Confocal microscopy, single-step images of distal airway epithelium from a postnatal day-7 (P7) *Fgfr2*-mutant lung (left) and a wildtype littermate (right). Immunofluorescence for *Scgb3a1* (Yellow) and *Ager* (Cyan). *Rosa26-Ai14* (magenta) indicates cells that underwent recombination. Nuclei-DAPI: grey. Scale-bar 5  $\mu$ m. “arw”: airway. Three lungs for each condition were analysed. **(G)** Violin plots of the genes encoding Wnt receptors *Fzd1*, *Fzd5* and *Ryk*, the *Kdr* and its ligand *Vegfa* and *Shh*. In all violin plots, expression levels:  $\log_2(\text{normalized UMI-counts}+1)$  (library size was normalized to 10.000). Colours as in “B”.

915

916

917

918

919

920

921

922

923

924

925

926

927

928

929

930

931

932

933

934

935

936

937

938

939

940

941

942

943

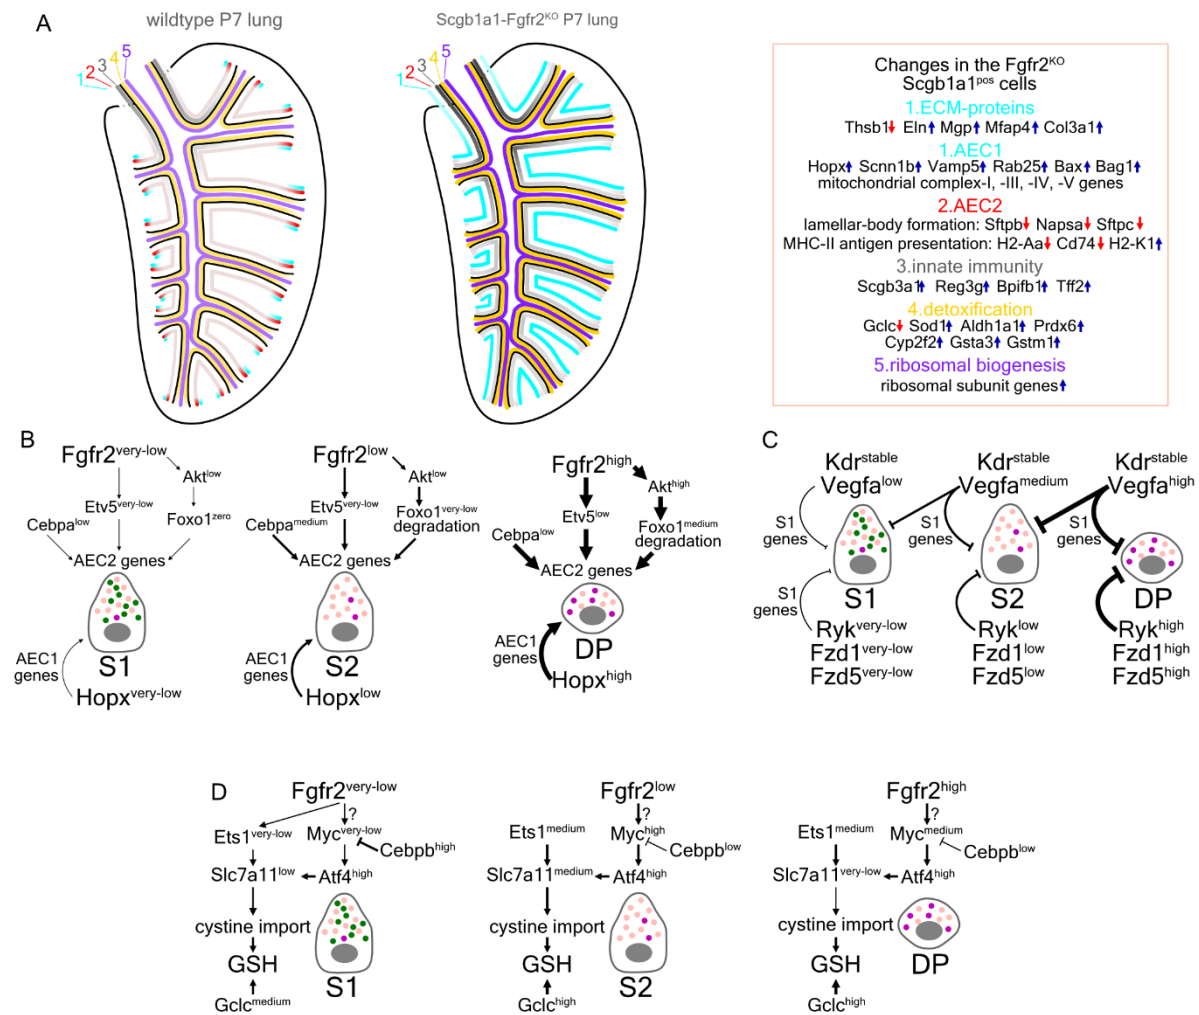

**Figure 7. Synopsis of the Fgfr2-inactivation effects on perinatal airway secretory epithelium.** (A) Schematic representation of the airway epithelium in postnatal day-7 wildtype (left) and Scgb1a1-Fgfr2<sup>KO</sup> (right) lung. Colour intensity: activation level. Dark: high, Fade: low. ECM: extracellular matrix, AEC2: alveolar secretory cell type-2 genes, AEC1: alveolar secretory cell type-1 genes. (B) Model for the role of Fgf-signaling and Hopx in the regulation of AEC2 and AEC1 genes in the secretory cell populations along the airway epithelium. (C) Model for the role of Vegfa/Kdr pathway and Wnt-signaling in the regulation of S1-related gene expression programs in the secretory cell populations along the airway epithelium. (D) Model for the role of Fgf-signaling in the expression of genes involved in production of glutathione (GSH) in the airway secretory cells.

944

945

946

947

948

949

950

951

952

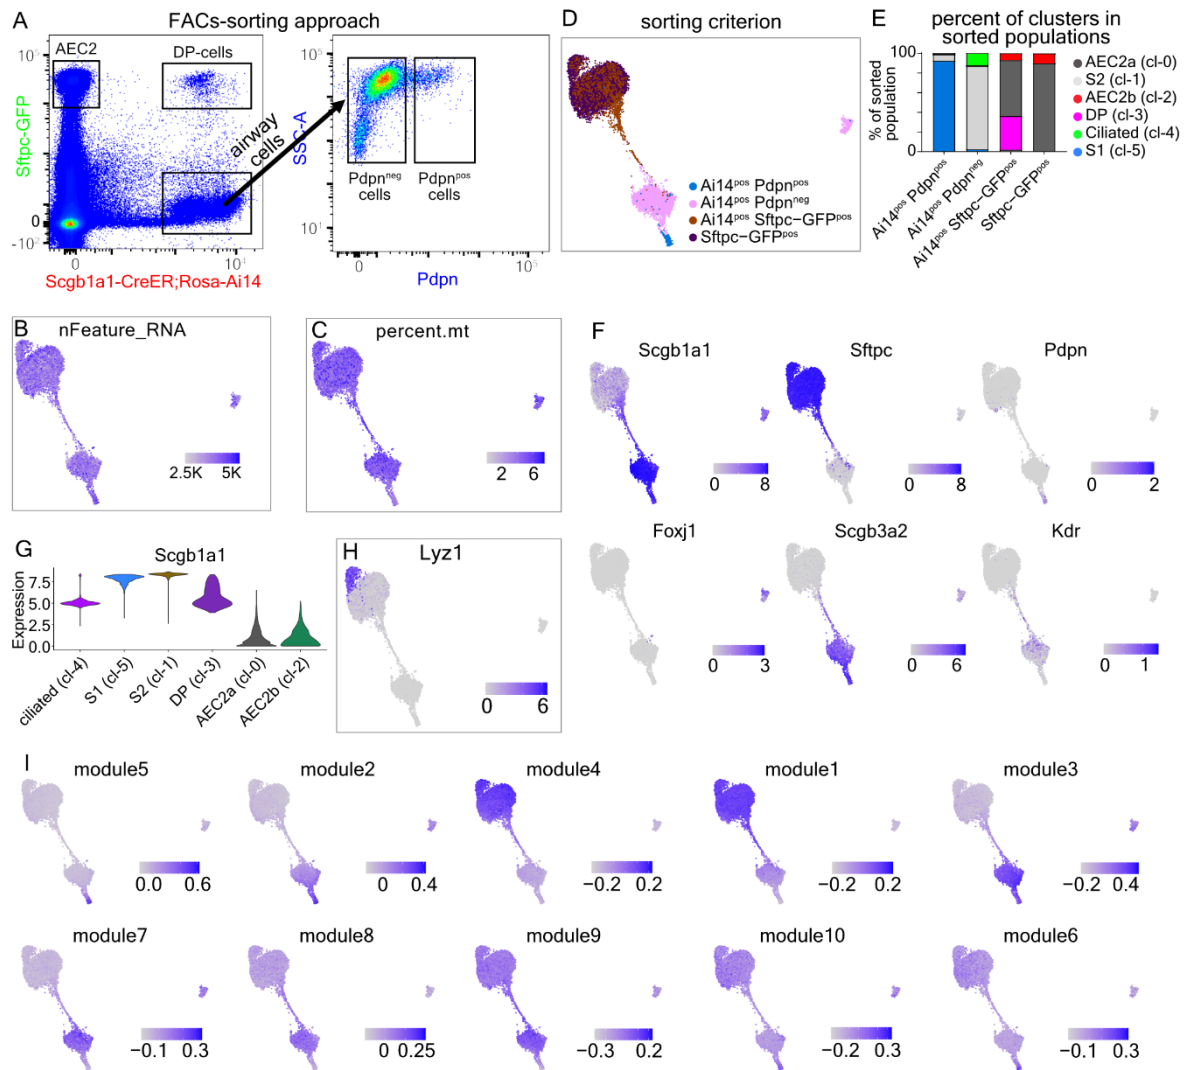

**Extended Data Figure 1. Characterization of lung secretory cell heterogeneity.** (A) FACS-sorting approach for isolation of AEC2, DP-cells and S1- with S2- cells (left) and S2 (Pdpn<sup>neg</sup>) and S1 (Pdpn<sup>pos</sup>) cells (right). (B-C) UMAP-plots of showing numbers of detected genes and the percentage of mitochondrial genes, respectively. (D) UMAP-plot showing the correspondance of sorting criteria for cell isolation for each cluster. (E) Bar-plot showing the percentage of cells in the clusters, according to the sorting criteria. (G) Violin plot of *Scgb1a1* expression in the clusters. (H) UMAP-plot of *Lyz1* expression. (F) UMAP-plots of the known cell-type markers *Scgb1a1*, *Sftpc*, *Pdpn*, *Foxj1*, *Scgb3a2* and *Kdr*. In “G-F”, expression levels as log<sub>2</sub>(normalized UMI-counts+1) (library size was normalized to 10.000). (I) UMAP-plots showing the aggregated expression scores of the genes in the 10 suggested modules (Fig. 2B). Blue: high, Gray: low.

953

954

955

956

957

958

959



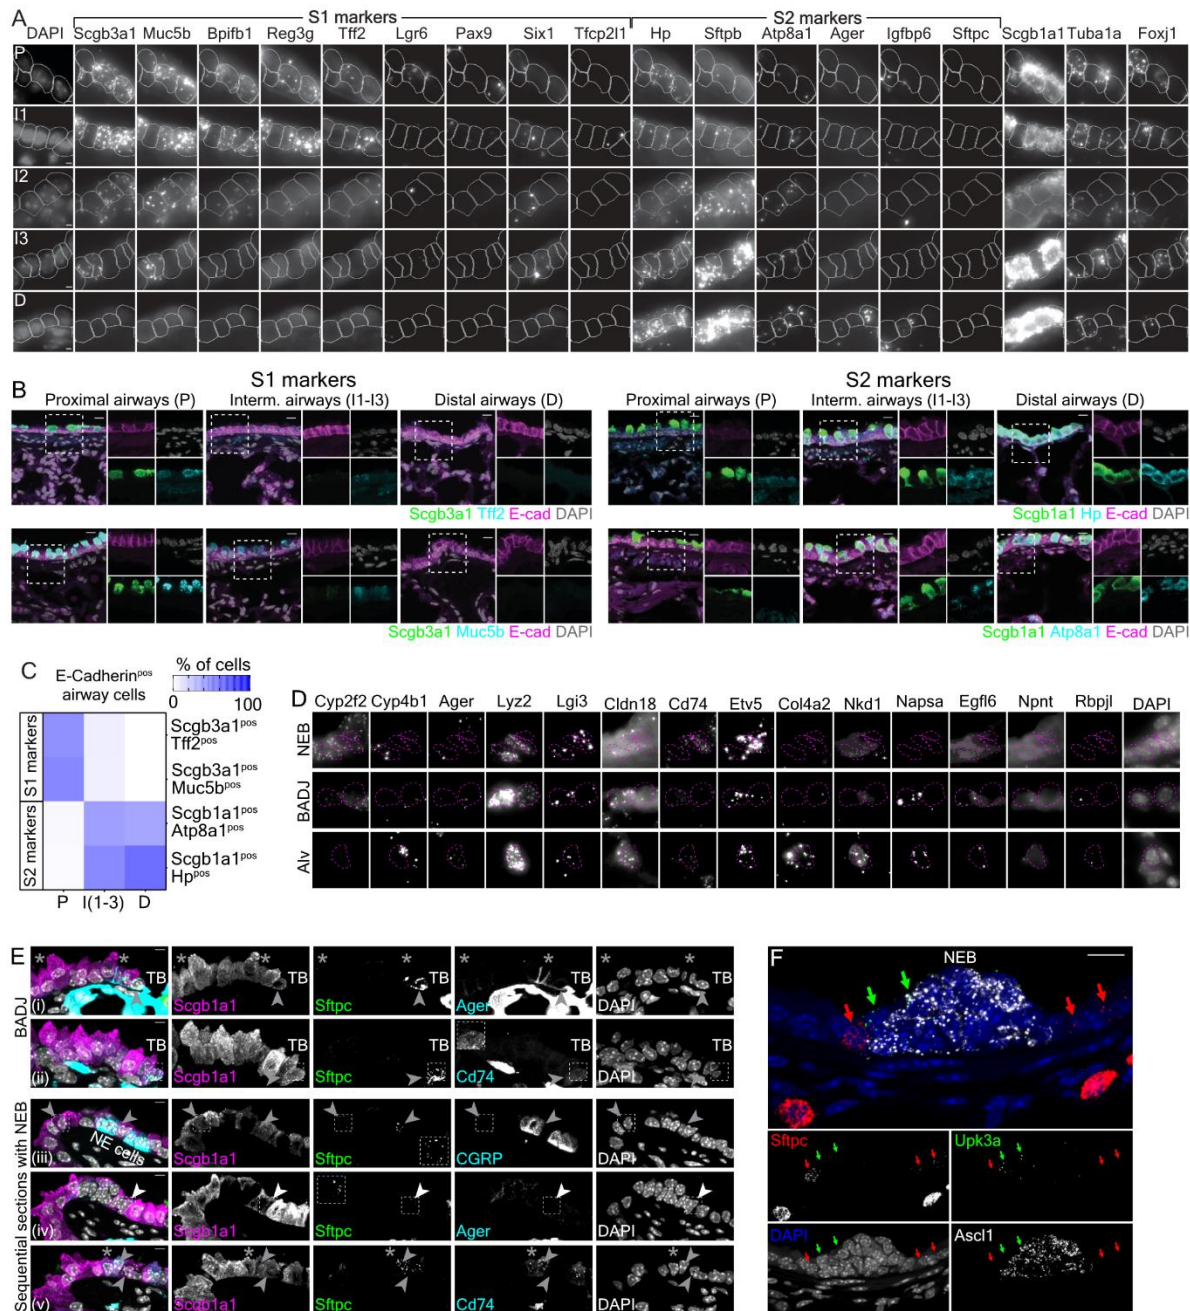

**Extended Data Figure 2. Spatial validation of gene expression markers. (A)**

Characteristic examples of detected mRNA molecules with SCRINSHOT for the analysed genes, in the indicated domains. Projected cell-ROIs: manually segmented nuclei, expanded for 2  $\mu$ m. **(B)** Confocal microscopy images of immunofluorescence for: Scgb3a1, E-cadherin (Ecad) and Tff2 or Scgb3a1, Ecad and Muc5b in proximal (left), intermediate (middle) and distal (right) airway regions. Scgb3a1: green, Muc5b or Tff2: cyan, Ecad: magenta, Nuclei (DAPI): grey. (Bottom-S2 markers) Scgb1a1, Ecad and Hp or Scgb1a1, Ecad and Atp8a1. Scgb1a1: green, Hp or Atp8a1: cyan, Ecad: magenta, Nuclei (DAPI): grey. Scale bar: 10  $\mu$ m. **(C)** Heatmap showing the percent of double positive cells of the indicated markers, in the proximal, intermediate and distal airways. Five images/domain were quantified. Scgb3a1-Tff2 staining: P: 141 cells, I (1-3): 157 cells, D: 209 cells, Scgb3a1-Muc5b staining: P: 149 cells, I (1-3): 194 cells, D: 181 cells, Scgb1a1-Hp staining: P: 123 cells, I (1-3): 167 cells, D: 170 cells, Scgb1a1-Atp8a1 staining: P: 120 cells, I (1-3):



186 cells, D: 172 cells. **(D)** Single-channel images of the analysed ROIs in Fig. 3F, showing SCRINSHOT signal. **(E)** Representative confocal images of Scgb1a1 and Sftpc immunofluorescence in combination with Ager (i) and Cd74 (ii) in TBs of an adult lung section. Arrows: Scgb1a1<sup>pos</sup> Sftpc<sup>pos</sup> cells and asterisks: Scgb1a1<sup>pos</sup>Ager<sup>pos</sup>Sftpc<sup>pos</sup> cells, showing that airway epithelial cells that expressed Sftpc and/or Cd74 and vice versa, suggesting for additional heterogeneity within airway epithelium (iii-v) Sequential section images of the same airway junction showing Scgb1a1<sup>pos</sup>Sftpc<sup>pos</sup> cells in relation to CGRP (iii), Ager (iv) and Cd74 (v). (iii-iv) Arrows: Scgb1a1<sup>pos</sup>Sftpc<sup>pos</sup> cells. (v) Arrow: a Scgb1a1<sup>pos</sup>Sftpc<sup>pos</sup>Cd74<sup>pos</sup> cell, asterisk: a Scgb1a1<sup>pos</sup>Sftpc<sup>neg</sup>Cd74<sup>pos</sup> and arrowhead: a Scgb1a1<sup>pos</sup>Sftpc<sup>neg</sup>Cd74<sup>neg</sup>. Scgb1a1<sup>pos</sup> Sftpc<sup>pos</sup> Ager<sup>pos</sup> cells are only found in TBs suggesting that DP-cells are only a subset of the very distal airway Scgb1a1<sup>pos</sup> Ager<sup>pos</sup> cells. Images are maximal-intensity projections of 9 z-stacks. Inserts: magnifications of the indicated areas. Scale-bar 5  $\mu$ m. “DP”: Scgb1a1<sup>pos</sup> Sftpc<sup>pos</sup> cells. **(F)** Confocal image of a representative neuroepithelial body (NEB), showing that Upk3a<sup>pos</sup> cells are mainly found over the neuroendocrine Ascl1<sup>pos</sup> cells, whereas Sftpc<sup>pos</sup> airway cells are localized laterally of them. Sftpc: red, Upk3a: green, Ascl1: grey and DAPI: blue. Scale bars 10  $\mu$ m. “PD”: proximal-distal, “DP”: Scgb1a1<sup>pos</sup> Sftpc<sup>pos</sup> double-positive. “Alv”: alveolar, “Arw”: airway, “TB”: terminal-bronchiole, “BADJ”: bronchiole-alveolar duct junction. At least three lungs were analysed for each experiment with similar results.

960

961

962

963

964

965

966

967

968

969

970

971

972

973

974

975

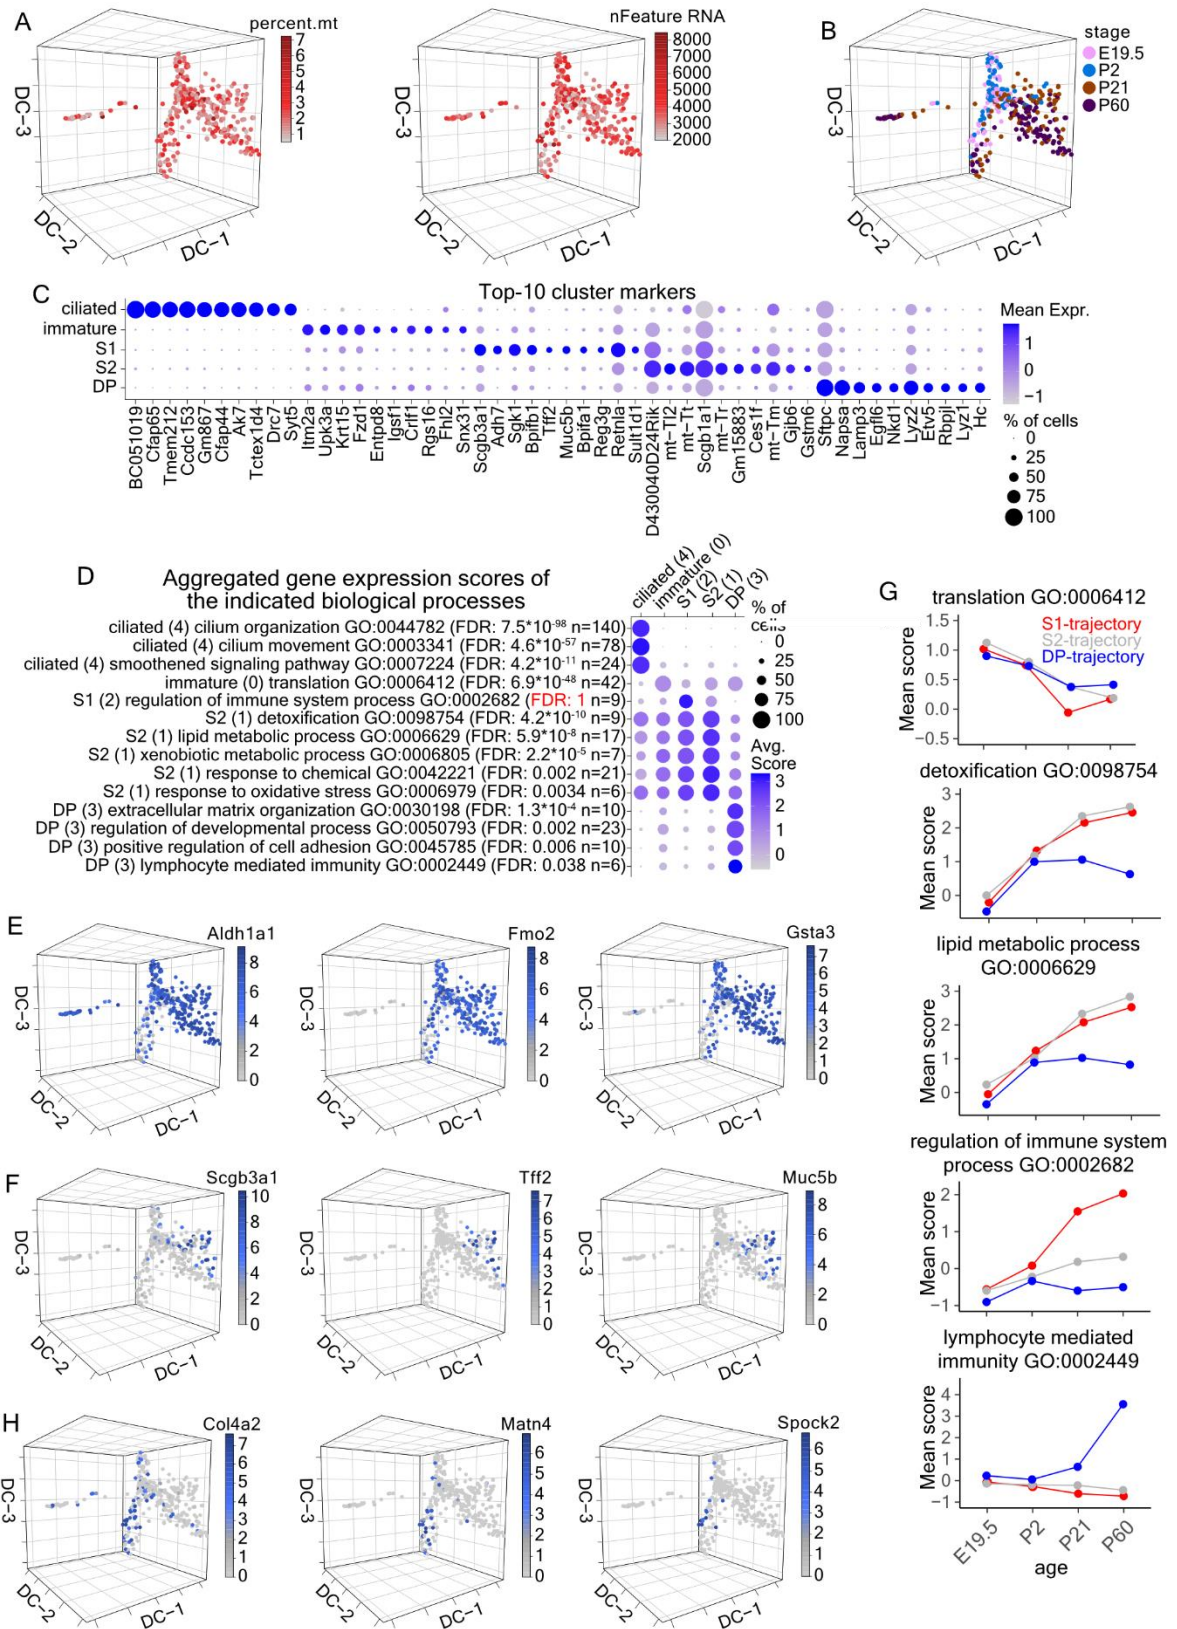

**Extended Data Figure 3. Lineage-tracing of airway secretory cell heterogeneity. (A)** 3D diffusion-map plots of 354 full-length, single-cell cDNA libraries, showing the percent of mitochondrial counts (left) and number of detected genes (right). Red: high, Gray: low. **(B)** Diffusion-map plot showing the stage of the analysed cells. **(C)** Balloon-plot of the top-10 cluster markers, according to MAST differential expression analysis. The genes were filtered

according to average log<sub>2</sub> Fold-change (>0.5), adjusted p-value (<0.05) and percent of positive cells (>0.25) and the top-10 markers according to average log<sub>2</sub> Fold-change were plotted. Gene order follows the cluster order. Balloon size: percent of positive cells. Colour intensity: scaled expression. Blue: high, Gray: low. **(D)** Balloon-plot of the average, aggregated gene expression scores of selected biological processes. The analysis is based on the statistically significant cluster markers (Suppl. Table 6). Balloon size: percentage of positive cells. Colour intensity: aggregated expression. Blue: high, Gray: low. “FDR”: false discovery rate, “n”: number of genes. **(E-F)** Diffusion-map plots showing the expression of the metabolic enzymes *Aldh1a1*, *Fmo2* and *Gsta3* (E) and of the innate immunity genes *Scgb3a1*, *Tff2* and *Muc5b* (F). Expression levels: log<sub>2</sub>(normalized counts+1) (library size was normalized to 10<sup>6</sup>). Blue: high, Gray: zero. **(G)** Line-plots of the Mean aggregated gene expression scores of the indicated biological processes in the S1 (left) and S2 (right) cell clusters, according to their age. **(H)** As in “D” for the extracellular matrix proteins *Col4a2*, *Matn4* and *Spock2* that are expressed in the middle part of the DP-trajectory.

976

977

978

979

980

981

982

983

984

985

986

987

988

989

990

991

992

993

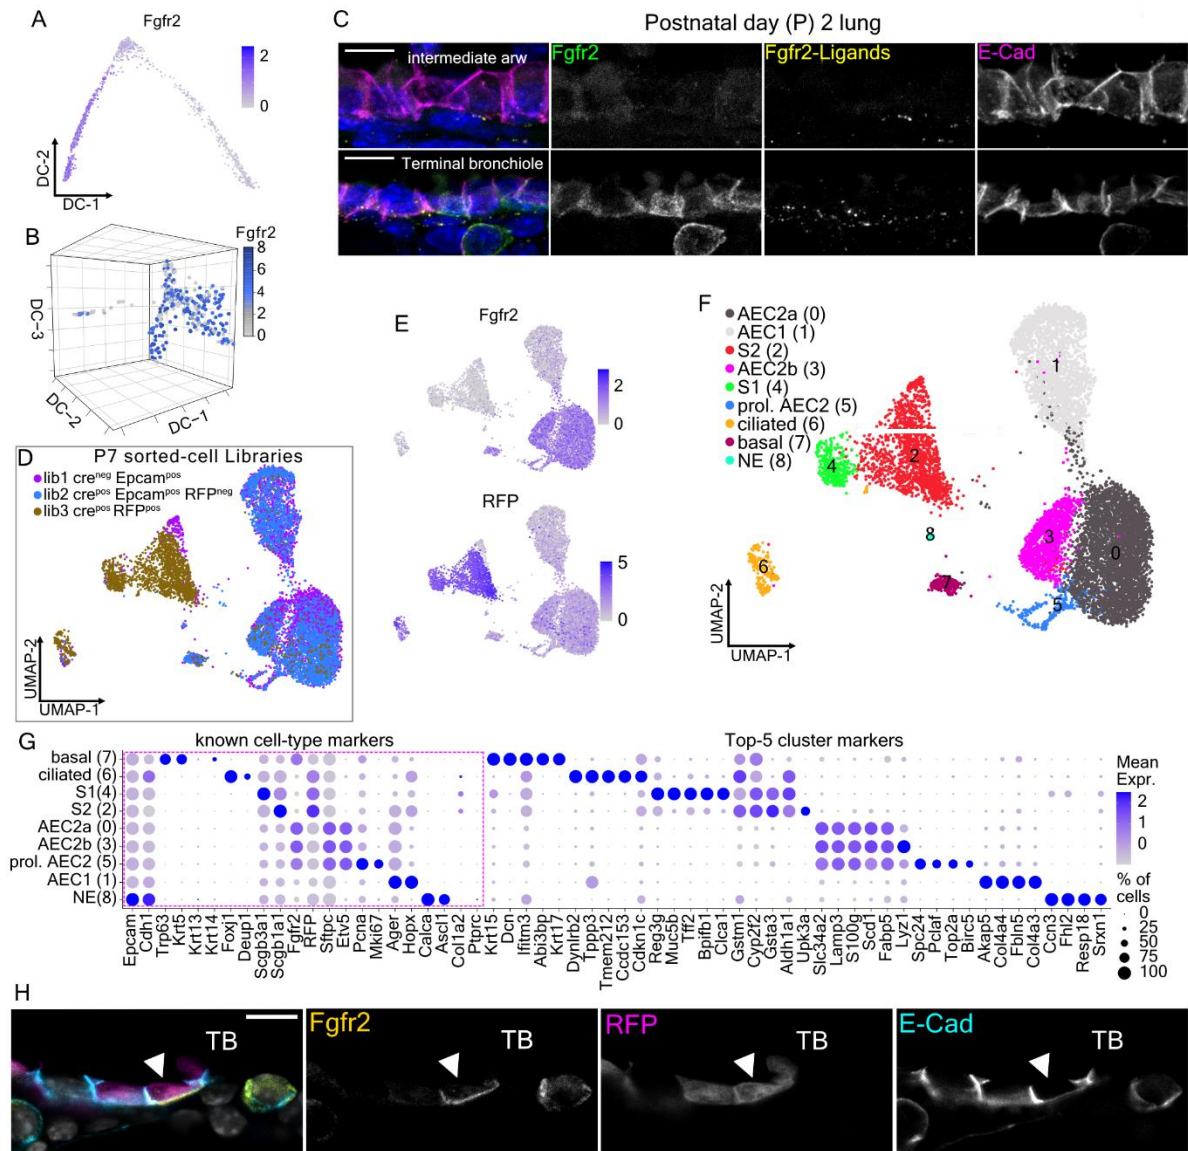

**Extended Data Figure 4. *Fgfr2* expression and its inactivation in airway epithelium.**

**(A-B)** Diffusion-map plots showing *Fgfr2* expression in the adult (top) and lineage tracing (bottom) scRNA-Seq datasets. Expression levels: (A)  $\log_2(\text{normalized UMI-counts}+1)$  (library size was normalized to 10,000), (B)  $\log_2(\text{counts}+1)$  (library size was normalized to  $10^6$ ). **(C)** Confocal microscopy z-stack projection images of representative intermediate (top) and distal (bottom) airways for E-cadherin (red), *Fgfr2* (green), *Fgfr2* ligands (*Fgfr2 $\beta$*  (IIIb) Fc chimeric protein, yellow) and nuclei (DAPI-blue). Images are maximal-intensity projections of 8 z-stacks. Scale bar: 10 $\mu$ m. **(D)** UMAP-plot showing the sequenced library-information of the analysed cells. **(E)** UMAP-plots showing the *Fgfr2* (top) and RFP (bottom) expression in the analysed dataset. Expression levels as  $\log_2(\text{normalized UMI-counts}+1)$  (library size was normalized to 10,000). **(F)** UMAP-plot showing the cell clusters and their annotations. **(G)** Balloon-plot of known cell-type markers (*Epcam-Ptprc*) and of the top-5 cluster markers. Genes were filtered according to average adjusted p-value (<0.05), percent of positive cells in the corresponding cluster (>0.25) and difference in positive cells (>0.5) and the top-5 markers according to average  $\log_2$  Fold-change were plotted. Gene order follows the cluster order. Balloon size: percent of positive cells. Colour intensity: scaled expression. In all plots, blue: high, grey: zero/low. **(H)** Single-plane confocal microscopy

images of a terminal bronchiole from a postnatal day-7 (P7) *Fgfr2*-mutant lung. Immunofluorescence for *Fgfr2* (yellow), *Rosa26-Ai14* (red), E-cadherin (cyan) and nuclei (DAPI-grey). Arrow-head: airway epithelial that recombined the *Rosa26-RFP* locus but remains *Fgfr2*<sup>pos</sup>, indicating inefficient *Fgfr2*-inactivation. Scale-bar 10µm.

994

995

996

997

998

999

1000

1001

1002

1003

1004

1005

1006

1007

1008

1009

1010

1011

1012

1013

1014

1015

1016

1017







inactivation dataset (see Extended Data Fig. 4F). Gene-order as in Fig 6C. Colour: scaled expression. blue: high, grey: low.

1018

1019

1020

1021

1022

1023

1024

1025

1026

1027

1028

1029

1030

1031

1032

1033

1034

1035

1036

1037

1038

1039

1040

1041

1042

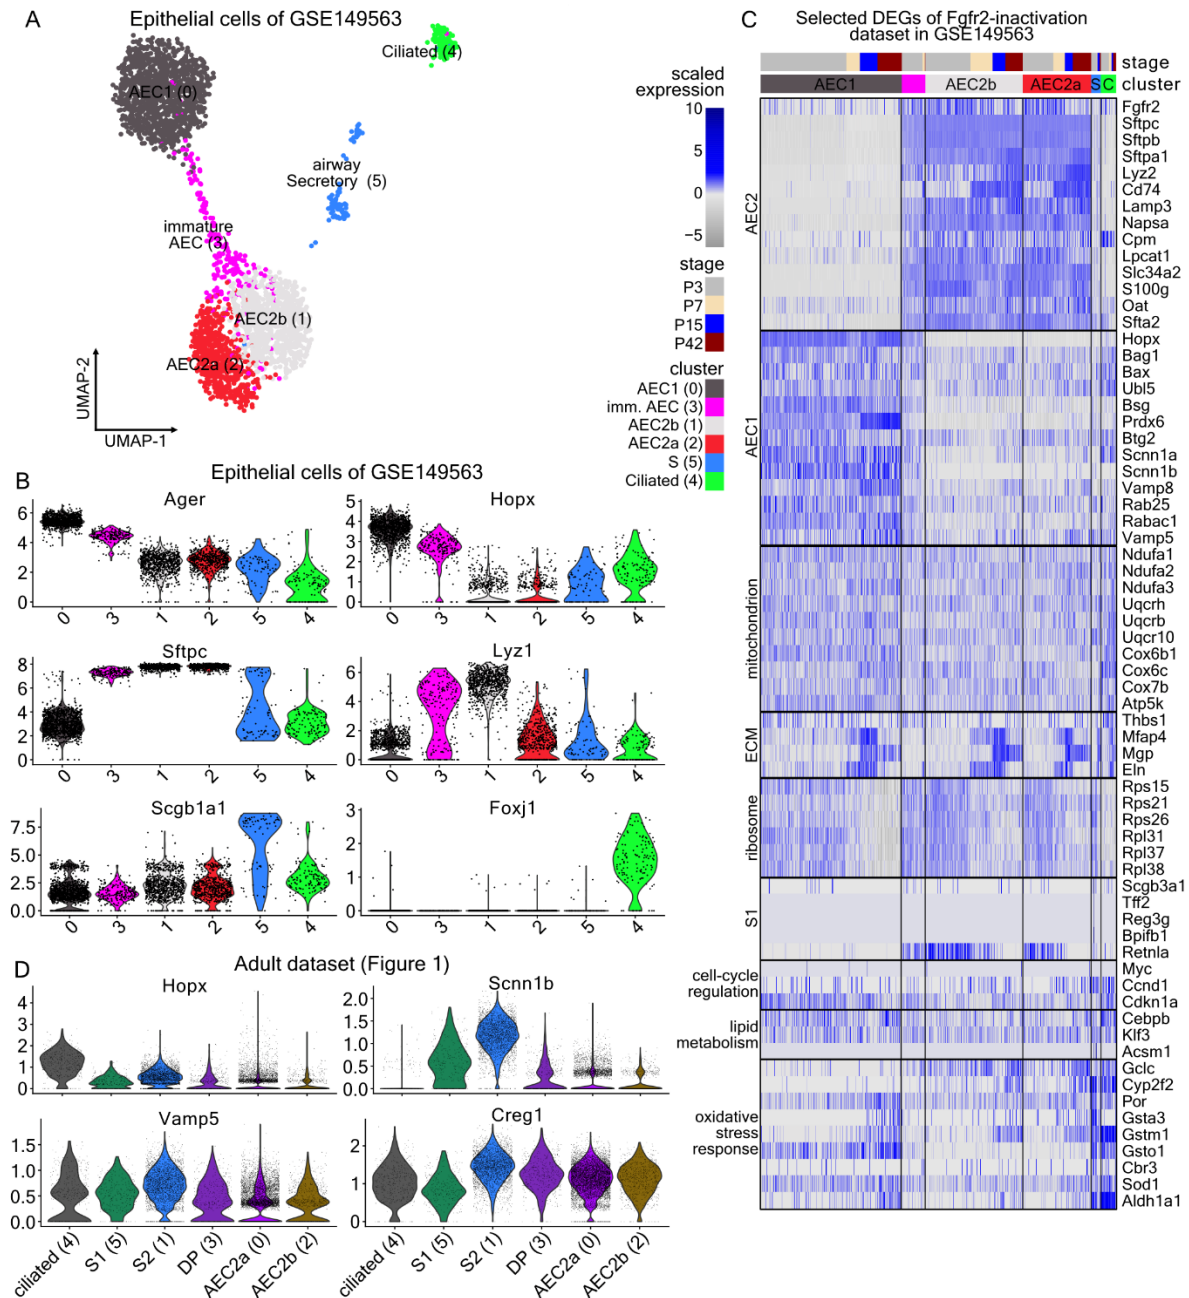

**Extended Data Figure 6. Epithelial cell analysis of the GSE149563.** (A) UMAP-plot of 3053 *Pecam1*<sup>neg</sup> *Col1a2*<sup>neg</sup> epithelial cells of the publicly available GSE149563 single-cell RNA Sequencing dataset. Colours: suggested clusters. (B) Violin-plots of known cell-type markers that were used for cluster-annotations. *Ager* and *Hopx* (AEC1), *Sftpc* and *Lyz1* (AEC2), *Scgb1a1* (airway secretory) and *Foxj1* (ciliated). (C) Heatmap of the epithelial cells of GSE149563, ordered by cluster, showing the expression of selected, differentially expressed genes between the wildtype (library-1) and the mutant (library-3) airway secretory cells. Gene-order as in Fig. 6C. Colour: scaled expression. blue: high, grey: low. (D) Violin-plots of *Hopx*, *Scnn1b*, *Vamp5* and *Creg1* in the adult cell dataset of the present study (colours as in Fig. 1C). In all violin-plots expression levels as log<sub>2</sub>(normalized UMI-counts+1) (library size was normalized to 10.000).

1043

1044

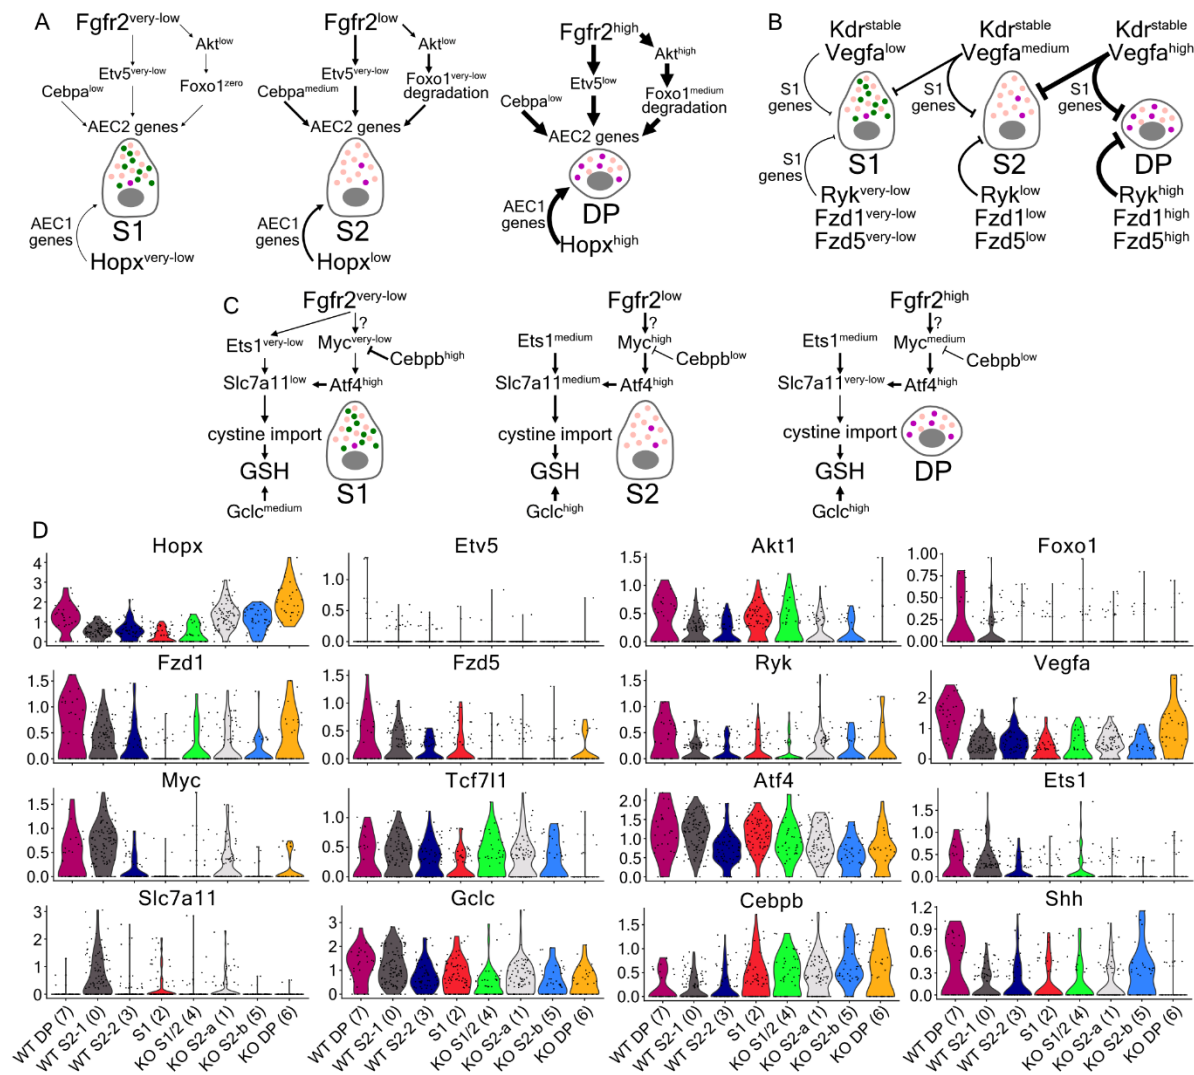

**Supplementary Figure 1. Supporting information to Figure 7 proposed models. (A-C)** Proposed models of signaling pathways in the normal epithelium, as in Figure 7. **(D)** Violin plots showing the expression levels of the included genes in the models that change upon *Fgfr2*-inactivation. Expression levels:  $\log_2(\text{normalized UMI-counts}+1)$  (library size was normalized to 10,000).

1045

1046

1047

1048

1049

1050

1051

1052

1053

1054

1055

1056 **Supplementary Table 1.** Results of the differential expression analyses of the adult single-  
1057 cell RNA Sequencing dataset with MAST. **(A)** Comparison of each cluster against all others.  
1058 **(B)** Filtered genes of “A”, adjusted p-value <0.05, pct.1 (percent of positive cells in the  
1059 corresponding cluster) >0.25, log2 Fold-change >0.5. **(C)** Comparison of the two alveolar  
1060 epithelial cell type 2 (AEC2) clusters -0 and -2. **(D)** Comparison of the airway secretory clusters  
1061 -1 (S2) and -5 (S1). **(E)** Comparison of the AEC2a cluster-0 with the double positive (DP)  
1062 cluster-3. **(F)** Comparison of the airway S2 cluster-1 with the double positive (DP) cluster-3.

1063

1064 **Supplementary Table 2.** Results of the gene ontology analyses. The tables include the  
1065 enriched biological processes in each of the adult cell clusters, based on the genes in Suppl.  
1066 Table 1B. The results were filtered for false discovery rate (FDR) <0.05 and fold enrichment  
1067 >2.

1068

1069 **Supplementary Table 3.** Differentially expressed genes and their related biological processes  
1070 along pseudotime trajectory. **(A)** The 10 modules of differentially expressed genes along the  
1071 adult secretory cell pseudotime trajectory. **(B-G)** Results of the gene ontology analyses,  
1072 showing the enriched biological processes of each gene-module. The modules 8-10 did not  
1073 produce enriched biological processes with false discovery rate (FDR) <0.05 and fold  
1074 enrichment >2. **(H-I)** Detailed information of the biological processes and genes in Fig. 2C-D.

1075

1076 **Supplementary Table 4.** Positional statistics of double positive (DP) Scgb1a1<sup>pos</sup> Sftpc<sup>pos</sup> cells  
1077 using one-way ANOVA with Kruskal-Wallis multiple comparisons test.

1078

1079 **Supplementary Table 5.** Results of the differential expression analysis of all clusters in the  
1080 lineage-tracing dataset, using MAST. **(A)** Comparison of each cluster against all others. **(B)**  
1081 Filtered genes of “A” with adjusted p-value <0.05, **(C)** Filtered genes of “A” with adjusted p-  
1082 value <0.05, pct.1 (percent of positive cells in the corresponding cluster) >0.25, log2 Fold-  
1083 change >0.5.

1084

1085 **Supplementary Table 6.** Results of the gene ontology analyses. The tables include the  
1086 enriched biological processes in each of the lineage-tracing dataset cell clusters, based on  
1087 the genes in Suppl. Table 5B. The results were filtered for false discovery rate (FDR) <0.05  
1088 and fold enrichment >2.

1089

1090 **Supplementary Table 7.** Results of the differential expression analyses from the Fgfr2-  
1091 inactivation experiment with MAST. **(A)** Comparison of each cluster against all others from the  
1092 whole Fgfr2-inactivation dataset (see Extended Data Fig. 4F). **(B)** Comparison of each cluster

1093 against all others from the airway secretory cell dataset (see Fig. 6B). **(C)** Filtered genes of  
1094 “B”, using adjusted p-value <0.05, percent of positive cells in the corresponding cluster (>0.5)  
1095 and log2 Fold-change >0.25. **(D)** Comparison of the wildtype (library-1) with the mutant  
1096 (library-3) cells of the airway secretory cell dataset (see Extended Data Fig. 5B). **(E)** Filtered  
1097 genes of “D”, using adjusted p-value <0.05, log2 Fold-change >0.25. **(G)** Genes of “E”  
1098 including the gene description, gene type, how it changes compared to wildtype cells and the  
1099 most relevant biologicals process, molecular functions and cellular components retrieved  
1100 from Biomart database of ensembl.org. Additional information about the gene function was  
1101 also included if available. Red-font: selected genes for heatmap plots in Fig. 6C and Extended  
1102 Data Fig. 5D-E and 6C. **(G)** Transcription Factors that are found in “C”.

1103

1104 **Supplementary Table 8.** Results of the gene ontology analyses. The tables include the  
1105 enriched cellular components according to the differentially expressed genes (see Suppl.  
1106 Table 7E) of airway secretory **(A)** wildtype (library-1) and **(B)** mutant cells (library-3). The  
1107 results were filtered for false discovery rate (FDR) <0.05 and fold enrichment >2. **(C)**  
1108 Information about the terms in Fig. 6D.

1109

1110 **Supplementary Table 9.** List of the used antibodies in the study.

1111

1112 **Supplementary Table 10.** List of used SCRINSHOT probes in the study.

1113

1114

1115

1116

1117

1118

1119

1120

1121

1122

1123

## 1124 References

- 1125 1. Morrisey, E.E. & Hogan, B.L. Preparing for the first breath: genetic and cellular  
1126 mechanisms in lung development. *Dev Cell* **18**, 8-23 (2010).
- 1127 2. Metzger, R.J., Klein, O.D., Martin, G.R. & Krasnow, M.A. The branching programme  
1128 of mouse lung development. *Nature* **453**, 745-750 (2008).
- 1129 3. *Lung Stem Cells in Development, Health and Disease*. (2021).
- 1130 4. Boers, J.E., Ambergen, A.W. & Thunnissen, F.B. Number and proliferation of basal  
1131 and parabasal cells in normal human airway epithelium. *Am J Respir Crit Care Med*  
1132 **157**, 2000-2006 (1998).
- 1133 5. Montoro, D.T. *et al.* A revised airway epithelial hierarchy includes CFTR-expressing  
1134 ionocytes. *Nature* **560**, 319-324 (2018).
- 1135 6. Plasschaert, L.W. *et al.* A single-cell atlas of the airway epithelium reveals the CFTR-  
1136 rich pulmonary ionocyte. *Nature* **560**, 377-381 (2018).
- 1137 7. Kadur Lakshminarasimha Murthy, P. *et al.* Human distal lung maps and lineage  
1138 hierarchies reveal a bipotent progenitor. *Nature* **604**, 111-119 (2022).
- 1139 8. Reynolds, S.D., Reynolds, P.R., Pryhuber, G.S., FINDER, J.D. & Stripp, B.R.  
1140 Secretoglobins SCGB3A1 and SCGB3A2 define secretory cell subsets in mouse and  
1141 human airways. *Am J Respir Crit Care Med* **166**, 1498-1509 (2002).
- 1142 9. Tata, P.R. & Rajagopal, J. Plasticity in the lung: making and breaking cell identity.  
1143 *Development* **144**, 755-766 (2017).
- 1144 10. Fanucchi, M.V., Murphy, M.E., Buckpitt, A.R., Philpot, R.M. & Plopper, C.G. Pulmonary  
1145 cytochrome P450 monooxygenase and Clara cell differentiation in mice. *Am J Respir*  
1146 *Cell Mol Biol* **17**, 302-314 (1997).
- 1147 11. Davis, J.D. & Wypych, T.P. Cellular and functional heterogeneity of the airway  
1148 epithelium. *Mucosal Immunology* **14**, 978-990 (2021).
- 1149 12. Hewitt, R.J. & Lloyd, C.M. Regulation of immune responses by the airway epithelial  
1150 cell landscape. *Nature Reviews Immunology* **21**, 347-362 (2021).
- 1151 13. Hoang, O.N. *et al.* Mucins MUC5AC and MUC5B Are Variably Packaged in the Same  
1152 and in Separate Secretory Granules. *Am J Respir Crit Care Med* **206**, 1081-1095  
1153 (2022).
- 1154 14. Singh, G. & Katyal, S.L. Clara cell proteins. *Ann N Y Acad Sci* **923**, 43-58 (2000).
- 1155 15. Rawlins, E.L., Ostrowski, L.E., Randell, S.H. & Hogan, B.L. Lung development and  
1156 repair: contribution of the ciliated lineage. *Proc Natl Acad Sci U S A* **104**, 410-417  
1157 (2007).
- 1158 16. Tan, F.E. *et al.* Myb promotes centriole amplification and later steps of the  
1159 multiciliogenesis program. *Development* **140**, 4277-4286 (2013).
- 1160 17. Tilley, A.E., Walters, M.S., Shaykhiev, R. & Crystal, R.G. Cilia dysfunction in lung  
1161 disease. *Annu Rev Physiol* **77**, 379-406 (2015).
- 1162 18. Giangreco, A. *et al.* Stem cells are dispensable for lung homeostasis but restore  
1163 airways after injury. *Proc Natl Acad Sci U S A* **106**, 9286-9291 (2009).
- 1164 19. Rawlins, E.L. *et al.* The role of Scgb1a1+ Clara cells in the long-term maintenance and  
1165 repair of lung airway, but not alveolar, epithelium. *Cell Stem Cell* **4**, 525-534 (2009).
- 1166 20. Kathiriya, J.J., Brumwell, A.N., Jackson, J.R., Tang, X. & Chapman, H.A. Distinct  
1167 Airway Epithelial Stem Cells Hide among Club Cells but Mobilize to Promote Alveolar  
1168 Regeneration. *Cell Stem Cell* (2020).
- 1169 21. Reynolds, S.D., Giangreco, A., Power, J.H.T. & Stripp, B.R. Neuroepithelial Bodies of  
1170 Pulmonary Airways Serve as a Reservoir of Progenitor Cells Capable of Epithelial  
1171 Regeneration. *The American Journal of Pathology* **156**, 269-278 (2000).
- 1172 22. Kim, C.F. *et al.* Identification of bronchioalveolar stem cells in normal lung and lung  
1173 cancer. *Cell* **121**, 823-835 (2005).
- 1174 23. Guha, A., Deshpande, A., Jain, A., Sebastiani, P. & Cardoso, W.V. Uroplakin 3a(+)  
1175 Cells Are a Distinctive Population of Epithelial Progenitors that Contribute to Airway  
1176 Maintenance and Post-injury Repair. *Cell Rep* **19**, 246-254 (2017).



- 1177 24. Liu, Q. *et al.* Lung regeneration by multipotent stem cells residing at the  
1178 bronchioalveolar-duct junction. *Nat Genet* (2019).
- 1179 25. Salwig, I. *et al.* Bronchioalveolar stem cells are a main source for regeneration of distal  
1180 lung epithelia in vivo. *EMBO J* (2019).
- 1181 26. Strunz, M. *et al.* Alveolar regeneration through a Krt8+ transitional stem cell state that  
1182 persists in human lung fibrosis. *Nat Commun* **11**, 3559 (2020).
- 1183 27. Choi, J. *et al.* Inflammatory Signals Induce AT2 Cell-Derived Damage-Associated  
1184 Transient Progenitors that Mediate Alveolar Regeneration. *Cell Stem Cell* **27**, 366-382  
1185 e367 (2020).
- 1186 28. Kobayashi, Y. *et al.* Persistence of a regeneration-associated, transitional alveolar  
1187 epithelial cell state in pulmonary fibrosis. *Nat Cell Biol* **22**, 934-946 (2020).
- 1188 29. Vanderbilt, J.N. *et al.* High-Efficiency Type II Cell-Enhanced Green Fluorescent  
1189 Protein Expression Facilitates Cellular Identification, Tracking, and Isolation. *American*  
1190 *Journal of Respiratory Cell and Molecular Biology* **53**, 14-21 (2015).
- 1191 30. Madisen, L. *et al.* A robust and high-throughput Cre reporting and characterization  
1192 system for the whole mouse brain. *Nature Neuroscience* **13**, 133-140 (2010).
- 1193 31. Sountoulidis, A. *et al.* SCRINSHOT, a spatial method for single-cell resolution mapping  
1194 of cell states in tissue sections. *bioRxiv*, 2020.2002.2007.938571 (2020).
- 1195 32. McInnes, L., Healy, J. & Melville, J. Umap: Uniform manifold approximation and  
1196 projection for dimension reduction. arXiv 2018. *arXiv preprint arXiv:1802.03426*  
1197 (1802).
- 1198 33. Jiang, M. *et al.* VEGF receptor 2 (KDR) protects airways from mucus metaplasia  
1199 through a Sox9-dependent pathway. *Dev Cell* **56**, 1646-1660 e1645 (2021).
- 1200 34. Hurskainen, M. *et al.* Single cell transcriptomic analysis of murine lung development  
1201 on hyperoxia-induced damage. *Nat Commun* **12**, 1565 (2021).
- 1202 35. Angerer, P. *et al.* destiny: diffusion maps for large-scale single-cell data in R.  
1203 *Bioinformatics* **32**, 1241-1243 (2015).
- 1204 36. Guha, A. *et al.* Analysis of Notch signaling-dependent gene expression in developing  
1205 airways reveals diversity of Clara cells. *PLoS One* **9**, e88848 (2014).
- 1206 37. Bingle, L. *et al.* BPIFB1 (LPLUNC1) is upregulated in cystic fibrosis lung disease.  
1207 *Histochem Cell Biol* **138**, 749-758 (2012).
- 1208 38. Winkelmann, V.E. *et al.* Inflammation-induced upregulation of P2X(4) expression  
1209 augments mucin secretion in airway epithelia. *Am J Physiol Lung Cell Mol Physiol* **316**,  
1210 L58-L70 (2019).
- 1211 39. Rothenberg, M.E. *et al.* IL-13 receptor alpha1 differentially regulates aeroallergen-  
1212 induced lung responses. *J Immunol* **187**, 4873-4880 (2011).
- 1213 40. Khalifeh-Soltani, A. *et al.* The Mfge8-alpha8beta1-PTEN pathway regulates airway  
1214 smooth muscle contraction in allergic inflammation. *FASEB J*, fj201800109R (2018).
- 1215 41. Yang, Z.C. *et al.* Targeted inhibition of Six1 attenuates allergic airway inflammation  
1216 and remodeling in asthmatic mice. *Biomed Pharmacother* **84**, 1820-1825 (2016).
- 1217 42. Park, K.S. *et al.* SPDEF regulates goblet cell hyperplasia in the airway epithelium. *J*  
1218 *Clin Invest* **117**, 978-988 (2007).
- 1219 43. Tian, B. *et al.* Central Role of the NF-kappaB Pathway in the Scgb1a1-Expressing  
1220 Epithelium in Mediating Respiratory Syncytial Virus-Induced Airway Inflammation. *J*  
1221 *Virology* **92** (2018).
- 1222 44. Kugler, M.C., Joyner, A.L., Loomis, C.A. & Munger, J.S. Sonic hedgehog signaling in  
1223 the lung. From development to disease. *Am J Respir Cell Mol Biol* **52**, 1-13 (2015).
- 1224 45. Peng, T. *et al.* Hedgehog actively maintains adult lung quiescence and regulates repair  
1225 and regeneration. *Nature* **526**, 578-582 (2015).
- 1226 46. Wang, C. *et al.* Expansion of hedgehog disrupts mesenchymal identity and induces  
1227 emphysema phenotype. *J Clin Invest* **128**, 4343-4358 (2018).
- 1228 47. Pariollaud, M. *et al.* Circadian clock component REV-ERBalpha controls homeostatic  
1229 regulation of pulmonary inflammation. *J Clin Invest* **128**, 2281-2296 (2018).
- 1230 48. Movassagh, H. *et al.* Semaphorin 3E Alleviates Hallmarks of House Dust Mite-Induced  
1231 Allergic Airway Disease. *Am J Pathol* **187**, 1566-1576 (2017).

- 1232 49. Toubi, E. & Vadasz, Z. Semaphorin3A is a promising therapeutic tool for bronchial  
1233 asthma. *Allergy* **75**, 481-483 (2020).
- 1234 50. Ahmadvand, N. *et al.* Fgfr2b signaling is essential for the maintenance of the alveolar  
1235 epithelial type 2 lineage during lung homeostasis in mice. *Cell Mol Life Sci* **79**, 302  
1236 (2022).
- 1237 51. Brownfield, D.G. *et al.* Alveolar cell fate selection and lifelong maintenance of AT2 cells  
1238 by FGF signaling. *Nat Commun* **13**, 7137 (2022).
- 1239 52. Liberti, D.C. *et al.* Alveolar epithelial cell fate is maintained in a spatially restricted  
1240 manner to promote lung regeneration after acute injury. *Cell Reports* **35**, 109092  
1241 (2021).
- 1242 53. Tian, Y. *et al.* LRRK2 plays essential roles in maintaining lung homeostasis and  
1243 preventing the development of pulmonary fibrosis. *Proc Natl Acad Sci U S A* **118**  
1244 (2021).
- 1245 54. Zhang, Z. *et al.* Transcription factor Etv5 is essential for the maintenance of alveolar  
1246 type II cells. *Proc Natl Acad Sci U S A* **114**, 3903-3908 (2017).
- 1247 55. Little, D.R. *et al.* Transcriptional control of lung alveolar type 1 cell development and  
1248 maintenance by NK homeobox 2-1. *Proc Natl Acad Sci U S A* **116**, 20545-20555  
1249 (2019).
- 1250 56. Little, D.R. *et al.* Differential chromatin binding of the lung lineage transcription factor  
1251 NKX2-1 resolves opposing murine alveolar cell fates in vivo. *Nat Commun* **12**, 2509  
1252 (2021).
- 1253 57. Sountoulidis, A. *et al.* SCRINSHOT enables spatial mapping of cell states in tissue  
1254 sections with single-cell resolution. *PLOS Biology* **18**, e3000675 (2020).
- 1255 58. Lee, J.-H. *et al.* Surfactant Protein-C Chromatin-Bound Green Fluorescence Protein  
1256 Reporter Mice Reveal Heterogeneity of Surfactant Protein C-Expressing Lung Cells.  
1257 *American Journal of Respiratory Cell and Molecular Biology* **48**, 288-298 (2013).
- 1258 59. Stupnikov, M.R., Yang, Y., Mori, M., Lu, J. & Cardoso, W.V. Jagged and Delta-like  
1259 ligands control distinct events during airway progenitor cell differentiation. *eLife* **8**,  
1260 e50487 (2019).
- 1261 60. Chen, H. *et al.* Airway epithelial progenitors are region specific and show differential  
1262 responses to bleomycin-induced lung injury. *Stem Cells* **30**, 1948-1960 (2012).
- 1263 61. Teisanu, R.M. *et al.* Functional analysis of two distinct bronchiolar progenitors during  
1264 lung injury and repair. *Am J Respir Cell Mol Biol* **44**, 794-803 (2011).
- 1265 62. McQualter, J.L., Yuen, K., Williams, B. & Bertoncello, I. Evidence of an epithelial  
1266 stem/progenitor cell hierarchy in the adult mouse lung. *Proc Natl Acad Sci U S A* **107**,  
1267 1414-1419 (2010).
- 1268 63. Gomperts, B.N., Gong-Cooper, X. & Hackett, B.P. Foxj1 regulates basal body  
1269 anchoring to the cytoskeleton of ciliated pulmonary epithelial cells. *J Cell Sci* **117**,  
1270 1329-1337 (2004).
- 1271 64. Balasooriya, G.I., Goschorska, M., Piddini, E. & Rawlins, E.L. FGFR2 is required for  
1272 airway basal cell self-renewal and terminal differentiation. *Development* **144**, 1600-  
1273 1606 (2017).
- 1274 65. Picelli, S. *et al.* Full-length RNA-seq from single cells using Smart-seq2. *Nature*  
1275 *Protocols* **9**, 171-181 (2014).
- 1276 66. Pogach, M.S., Cao, Y., Millien, G., Ramirez, M.I. & Williams, M.C. Key developmental  
1277 regulators change during hyperoxia-induced injury and recovery in adult mouse lung.  
1278 *J Cell Biochem* **100**, 1415-1429 (2007).
- 1279 67. Ahmadvand, N. *et al.* Identification of a novel subset of alveolar type 2 cells enriched  
1280 in PD-L1 and expanded following pneumonectomy. *Eur Respir J* **58** (2021).
- 1281 68. Namkoong, S. *et al.* The integral membrane protein ITM2A, a transcriptional target of  
1282 PKA-CREB, regulates autophagic flux via interaction with the vacuolar ATPase.  
1283 *Autophagy* **11**, 756-768 (2015).
- 1284 69. Chung, M.-I. & Hogan, B.L.M. Ager-CreERT2: A New Genetic Tool for Studying Lung  
1285 Alveolar Development, Homeostasis, and Repair. *American Journal of Respiratory*  
1286 *Cell and Molecular Biology* **59**, 706-712 (2018).

- 1287 70. Bellusci, S., Grindley, J., Emoto, H., Itoh, N. & Hogan, B.L.M. Fibroblast Growth Factor  
1288 10 (FGF10) and branching morphogenesis in the embryonic mouse lung. *Development*  
1289 **124**, 4867-4878 (1997).
- 1290 71. Jones, M.R. *et al.* FGFR2b signalling restricts lineage-flexible alveolar progenitors  
1291 during mouse lung development and converges in mature alveolar type 2 cells. *Cell*  
1292 *Mol Life Sci* **79**, 609 (2022).
- 1293 72. Herriges, J.C. *et al.* FGF-Regulated ETV Transcription Factors Control FGF-SHH  
1294 Feedback Loop in Lung Branching. *Dev Cell* **35**, 322-332 (2015).
- 1295 73. Dorry, S.J., Ansbrosio, B.O., Ornitz, D.M., Mutlu, G.M. & Guzy, R.D. FGFR2 Is Required  
1296 for AEC2 Homeostasis and Survival after Bleomycin-induced Lung Injury. *Am J Respir*  
1297 *Cell Mol Biol* **62**, 608-621 (2020).
- 1298 74. Moerlooze, L.D. *et al.* An important role for the IIIb isoform of fibroblast growth factor  
1299 receptor 2 (FGFR2) in mesenchymal-epithelial signalling during mouse  
1300 organogenesis. *Development* **127**, 483-492 (2000).
- 1301 75. Jain, R. *et al.* Plasticity of Hopx(+) type I alveolar cells to regenerate type II cells in the  
1302 lung. *Nat Commun* **6**, 6727 (2015).
- 1303 76. Yang, J. *et al.* The development and plasticity of alveolar type 1 cells. *Development*  
1304 **143**, 54-65 (2016).
- 1305 77. Liu, J. *et al.* CREG1 promotes lysosomal biogenesis and function. *Autophagy* **17**,  
1306 4249-4265 (2021).
- 1307 78. Ikezawa, M. *et al.* Loss of VAMP5 in mice results in duplication of the ureter and  
1308 insufficient expansion of the lung. *Dev Dyn* **247**, 754-762 (2018).
- 1309 79. Zepp, J.A. *et al.* Genomic, epigenomic, and biophysical cues controlling the  
1310 emergence of the lung alveolus. *Science* **371** (2021).
- 1311 80. Zaidi, A.R.S., Dresman, S., Burt, C., Rule, S. & McCallum, L. Molecular signatures for  
1312 CCN1, p21 and p27 in progressive mantle cell lymphoma. *J Cell Commun Signal* **13**,  
1313 421-434 (2019).
- 1314 81. Negretti, N.M. *et al.* A single-cell atlas of mouse lung development. *Development* **148**  
1315 (2021).
- 1316 82. Basu, A. & Haldar, S. The relationship between Bcl2, Bax and p53: consequences for  
1317 cell cycle progression and cell death. *Mol Hum Reprod* **4**, 1099-1109 (1998).
- 1318 83. Lyu, H. *et al.* Niche-mediated repair of airways is directed in an occupant-dependent  
1319 manner. *Cell Rep* **41**, 111863 (2022).
- 1320 84. Kim, H.T. *et al.* WNT/RYK signaling restricts goblet cell differentiation during lung  
1321 development and repair. *Proc Natl Acad Sci U S A* **116**, 25697-25706 (2019).
- 1322 85. Basil, M.C. *et al.* Human distal airways contain a multipotent secretory cell that can  
1323 regenerate alveoli. *Nature* **604**, 120-126 (2022).
- 1324 86. Sikkema, L. *et al.* An integrated cell atlas of the lung in health and disease. *Nat Med*  
1325 **29**, 1563-1577 (2023).
- 1326 87. Tameire, F. *et al.* ATF4 couples MYC-dependent translational activity to bioenergetic  
1327 demands during tumour progression. *Nat Cell Biol* **21**, 889-899 (2019).
- 1328 88. Berberich-Siebelt, F. *et al.* SUMOylation interferes with CCAAT/enhancer-binding  
1329 protein beta-mediated c-myc repression, but not IL-4 activation in T cells. *J Immunol*  
1330 **176**, 4843-4851 (2006).
- 1331 89. Lim, J.K.M. *et al.* Cystine/glutamate antiporter xCT (SLC7A11) facilitates oncogenic  
1332 RAS transformation by preserving intracellular redox balance. *Proc Natl Acad Sci U S*  
1333 *A* **116**, 9433-9442 (2019).
- 1334 90. Misra, I. & Griffith, O.W. Expression and purification of human gamma-  
1335 glutamylcysteine synthetase. *Protein Expr Purif* **13**, 268-276 (1998).
- 1336 91. Hogg, J.C. & Timens, W. The pathology of chronic obstructive pulmonary disease.  
1337 *Annu Rev Pathol* **4**, 435-459 (2009).
- 1338 92. Sauler, M. *et al.* Characterization of the COPD alveolar niche using single-cell RNA  
1339 sequencing. *Nature Communications* **13**, 494 (2022).

- 1340 93. Hafemeister, C. & Satija, R. Normalization and variance stabilization of single-cell  
1341 RNA-seq data using regularized negative binomial regression. *Genome Biol* **20**, 296  
1342 (2019).
- 1343 94. Hao, Y. *et al.* Integrated analysis of multimodal single-cell data. *Cell* **184**, 3573-3587  
1344 e3529 (2021).
- 1345 95. Finak, G. *et al.* MAST: a flexible statistical framework for assessing transcriptional  
1346 changes and characterizing heterogeneity in single-cell RNA sequencing data.  
1347 *Genome Biol* **16**, 278 (2015).
- 1348 96. Li, Z., Nagai, J.S., Kuppe, C., Kramann, R. & Costa, I.G. scMEGA: single-cell multi-  
1349 omic enhancer-based gene regulatory network inference. *Bioinformatics Advances* **3**  
1350 (2023).
- 1351 97. Street, K. *et al.* Slingshot: cell lineage and pseudotime inference for single-cell  
1352 transcriptomics. *BMC Genomics* **19**, 477 (2018).
- 1353 98. Van den Berge, K. *et al.* Trajectory-based differential expression analysis for single-  
1354 cell sequencing data. *Nat Commun* **11**, 1201 (2020).
- 1355 99. Müllner, D. fastcluster: Fast Hierarchical, Agglomerative Clustering Routines for R and  
1356 Python. *Journal of Statistical Software* **53**, 1 - 18 (2013).
- 1357 100. Hennig, C. & Imports, M. Package 'fpc'. *Flexible Procedures for Clustering* (2015).
- 1358 101. Kolde, R. & Kolde, M.R. Package 'pheatmap'. *R package* **1**, 790 (2015).
- 1359 102. Picelli, S. *et al.* Smart-seq2 for sensitive full-length transcriptome profiling in single  
1360 cells. *Nature Methods* **10**, 1096-1098 (2013).
- 1361 103. Ligges, U. & Maechler, M. scatterplot3d - An R Package for Visualizing Multivariate  
1362 Data. *Journal of Statistical Software* **8**, 1 - 20 (2003).
- 1363 104. McGinnis, C.S., Murrow, L.M. & Gartner, Z.J. DoubletFinder: Doublet Detection in  
1364 Single-Cell RNA Sequencing Data Using Artificial Nearest Neighbors. *Cell Syst* **8**, 329-  
1365 337.e324 (2019).
- 1366 105. Sountoulidis, A. *et al.* Activation of the canonical bone morphogenetic protein (BMP)  
1367 pathway during lung morphogenesis and adult lung tissue repair. *PLoS One* **7**, e41460  
1368 (2012).
- 1369 106. Schindelin, J. *et al.* Fiji: an open-source platform for biological-image analysis. *Nature*  
1370 *Methods* **9**, 676-682 (2012).
- 1371 107. Lamprecht, M.R., Sabatini, D.M. & Carpenter, A.E. CellProfiler™: free, versatile  
1372 software for automated biological image analysis. *BioTechniques* **42**, 71-75 (2007).
- 1373 108. Lee, J.H. *et al.* Anatomically and Functionally Distinct Lung Mesenchymal Populations  
1374 Marked by Lgr5 and Lgr6. *Cell* **170**, 1149-1163 e1112 (2017).
- 1375 109. Kassambara, A. & Kassambara, M.A. Package 'ggpubr'. *R package version 0.1* **6**  
1376 (2020).
- 1377
